# Supplementary material for: Adrenal suppression from glucocorticoids: preventing an iatrogenic cause of morbidity and mortality in children
Source: PubMed Central journal article supplement — BMJ Paediatr Open. 2019 Oct 23;3(1):e000569. doi: 10.1136/bmjpo-2019-000569 (PMC6830460; doi:10.1136/bmjpo-2019-000569), 2019-10-23
Supplement: bmjpo-2019-000569.draft_revisions.pdf [file bmjpo-2019-000569.draft_revisions.pdf]

# BMJ Paediatrics Open

BMJ Paediatrics Open is committed to open peer review. As part of this commitment we make the peer review history of every article we publish publicly available.

When an article is published we post the peer reviewers' comments and the authors' responses online. We also post the versions of the paper that were used during peer review. These are the versions that the peer review comments apply to.

The versions of the paper that follow are the versions that were submitted during the peer review process. They are not the versions of record or the final published versions. They should not be cited or distributed as the published version of this manuscript.

BMJ Paediatrics Open is an open access journal and the full, final, typeset and author-corrected version of record of the manuscript is available on our site with no access controls, subscription charges or pay-per-view fees (<http://bmjpaedsopen.bmj.com>).

If you have any questions on BMJ Paediatrics Open's open peer review process please email [info.bmjpo@bmj.com](mailto:info.bmjpo@bmj.com)

# BMJ Paediatrics Open

## Adrenal Suppression from Glucocorticoids: Preventing an Iatrogenic Cause of Morbidity and Mortality in Children

|                               |                                                                                                                                                                                                                                                                                                                                                                                                                                                                                                                                                                                                                                                                                                                                                                                                                                                                                                                                                                                                                                                                                                                          |
|-------------------------------|--------------------------------------------------------------------------------------------------------------------------------------------------------------------------------------------------------------------------------------------------------------------------------------------------------------------------------------------------------------------------------------------------------------------------------------------------------------------------------------------------------------------------------------------------------------------------------------------------------------------------------------------------------------------------------------------------------------------------------------------------------------------------------------------------------------------------------------------------------------------------------------------------------------------------------------------------------------------------------------------------------------------------------------------------------------------------------------------------------------------------|
| Journal:                      | <i>BMJ Paediatrics Open</i>                                                                                                                                                                                                                                                                                                                                                                                                                                                                                                                                                                                                                                                                                                                                                                                                                                                                                                                                                                                                                                                                                              |
| Manuscript ID                 | bmjpo-2019-000569                                                                                                                                                                                                                                                                                                                                                                                                                                                                                                                                                                                                                                                                                                                                                                                                                                                                                                                                                                                                                                                                                                        |
| Article Type:                 | Review                                                                                                                                                                                                                                                                                                                                                                                                                                                                                                                                                                                                                                                                                                                                                                                                                                                                                                                                                                                                                                                                                                                   |
| Date Submitted by the Author: | 19-Aug-2019                                                                                                                                                                                                                                                                                                                                                                                                                                                                                                                                                                                                                                                                                                                                                                                                                                                                                                                                                                                                                                                                                                              |
| Complete List of Authors:     | Ahmet, Alexandra; CHEO, Pediatrics, Division Endocrinology; University of Ottawa, Pediatrics<br>Mokashi, Arati; IWK Health Centre, Pediatrics, Division of Pediatric Endocrinology<br>Goldbloom, Ellen; Children's Hospital of Eastern Ontario, Pediatrics, Division of Pediatric Endocrinology; University of Ottawa, Pediatrics<br>Huot, Celine; University of Montreal, Pediatrics, Division of Endocrinology ; St. Justine Hospital<br>Jurencak, Roman; Children's Hospital of Eastern Ontario, Pediatrics, Division of Rheumatology; University of Ottawa, Pediatrics<br>Krishnamoorthy, Preetha; Montreal Childrens Hospital, Pediatrics, Division of Endocrinology; McGill University, Pediatrics<br>Rowan-Legg, Anne; Children's Hospital of Eastern Ontario, Pediatrics ; University of Ottawa, Pediatrics<br>Kim, Harold; St. Joseph's Hospital, Department of Medicine, Division of Clinical Immunology and Allergy<br>Pancer, Larry; Markham Stouffville Hospital, Pediatrics<br>Kovesi, Tom; Children's Hospital of Eastern Ontario, Pediatrics, Division of Respiriology; University of Ottawa, Pediatrics |
| Keywords:                     | Endocrinology, Therapeutics                                                                                                                                                                                                                                                                                                                                                                                                                                                                                                                                                                                                                                                                                                                                                                                                                                                                                                                                                                                                                                                                                              |
|                               |                                                                                                                                                                                                                                                                                                                                                                                                                                                                                                                                                                                                                                                                                                                                                                                                                                                                                                                                                                                                                                                                                                                          |

SCHOLARONE™  
Manuscripts

## Adrenal Suppression from Glucocorticoids: Preventing an Iatrogenic Cause of Morbidity and Mortality in Children

Alexandra Ahmet<sup>a</sup>, MD; Arati Mokashi<sup>b</sup>, MD; Ellen B Goldbloom<sup>a</sup>, MD; Celine Huot, MD<sup>c</sup>; Roman Jurencak<sup>d</sup>, MD; Preetha Krishnamoorthy<sup>e</sup>, MD; Anne Rowan-Legg<sup>f</sup>, MD; Harold Kim<sup>g</sup>, MD; Larry Pancer<sup>h</sup>, MD; Tom Kovesi<sup>i</sup>, MD

**Affiliations:** <sup>a</sup> Department of Pediatrics, Division of Endocrinology, Children's Hospital of Eastern Ontario, University of Ottawa, Ottawa, ON, Canada; <sup>b</sup>Department of Pediatrics, Division of Endocrinology, IWK Health Centre, Dalhousie University, Halifax, NS, Canada; <sup>c</sup>Department of Pediatrics, Division of Endocrinology, St. Justine Hospital, University de Montreal, Montreal QC, Canada; <sup>d</sup>Department of Pediatrics, Division of Rheumatology, Children's Hospital of Eastern Ontario, University of Ottawa, Ottawa, ON, Canada; <sup>e</sup>Department of Pediatrics, Division of Endocrinology, Montreal Children's Hospital, McGill University, Montreal QC, Canada; <sup>f</sup>Department of Pediatrics, Children's Hospital of Eastern Ontario, University of Ottawa, Ottawa, ON, Canada; <sup>g</sup>Department of Medicine, Division of Clinical Immunology and Allergy, St. Joseph's Hospital, London, ON Canada and Department of Medicine, Division of Clinical Immunology and Allergy, Hamilton, ON, Canada; <sup>h</sup>Department of Pediatrics, Markham Stouffville Hospital, Markham, ON, Canada; <sup>i</sup>Department of Pediatrics, Division of Respiriology, Children's Hospital of Eastern Ontario, University of Ottawa, Ottawa, ON, Canada.

**Address correspondence to:** Alexandra Ahmet, Children's Hospital of Eastern Ontario, 401 Smyth Rd., Ottawa ON, Canada, K1H 8L1, [aahmet@cheo.on.ca](mailto:aahmet@cheo.on.ca), 613-737-7600 ext. 3939

**Word Count:** 2478 (exclusive of abstract, title page, titles, tables, and references)

## Abstract

Adrenal suppression (AS) is an important side effect of glucocorticoids (GCs) including inhaled corticosteroids (ICS). AS can often be asymptomatic or associated with non-specific symptoms until a physiological stress such as an illness precipitates an adrenal crisis. Morbidity and death associated with adrenal crisis is preventable but continues to be reported in children. There is a lack of consensus about the management of children at risk of AS. However, health care professionals need to develop an awareness and approach to keep these children safe. In this article, current knowledge of the risk factors, diagnosis and management of AS are reviewed while drawing attention to knowledge gaps and areas of controversy. Possible strategies to reduce the morbidity associated with this iatrogenic condition are provided for health care professionals.

## Introduction

Glucocorticoids (GCs), including inhaled corticosteroids (ICS), are essential for the treatment of many pediatric disorders and have led to significant improvements in disease outcomes.

Hypothalamic Pituitary Adrenal (HPA) axis suppression, or adrenal suppression (AS), is a potential side effect of GC therapy, and can be associated with significant morbidity and even death.<sup>1-3</sup>

Adrenal suppression is the most common form of adrenal insufficiency (AI) amongst both children and adults.<sup>4,5</sup> Despite being a treatable condition, failure of adequate preventative measures or delayed treatment has led to unnecessary morbidity and death in individuals with AI including AS.<sup>4-6</sup>

Symptoms of AS are often non-specific (Table 1) and can go undetected until a physiologic stress (illness, surgery, injury) precipitates an adrenal crisis.<sup>4</sup> Adrenal crisis has also been reported in the absence of physiologic stress, likely secondary to unrecognized signs or symptoms of AS.<sup>2,4</sup> Symptomatic AS including adrenal crisis can be prevented by recognizing children at risk and administering physiologic GC replacement and/or higher doses of GCs during times of stress.<sup>3,4</sup>

A recent study evaluating the national incidence of symptomatic AS in children in Canada reported 46 cases including 6 (13%) cases of adrenal crisis over 2 years with 37/46 (80%) of children using ICS either alone or in combination with another form of GC.<sup>6</sup> Asymptomatic biochemical evidence of AS is considerably more frequent with nearly 100% of patients having

1  
2  
3 AS immediately after discontinuation of high dose systemic therapy but significantly less  
4  
5 frequent if measured after days or weeks or if exposed to other forms of GC therapy.<sup>7-10</sup>  
6  
7

8  
9  
10 Despite clear evidence of the morbidity associated with AS in the pediatric population, evidence-  
11  
12 based guidelines about screening and management of children at risk are lacking. There are few  
13  
14 known risk factors for the development of *symptomatic* AS, therefore the burden of screening for  
15  
16 and managing asymptomatic biochemical AS needs to be balanced with the risk of severe  
17  
18 morbidity and mortality in a subset of patients. There is a lack of consensus amongst pediatric  
19  
20 endocrinologists about the approach to the management of children at risk of AS and as a result,  
21  
22 clinicians who are prescribing GC therapy may have limited guidance about how to keep their  
23  
24 patients safe. Within this review article, our working group comprised of pediatric  
25  
26 endocrinologists, pediatricians and other pediatric subspecialists who frequently prescribe GC  
27  
28 therapy present the best available evidence about AS risk, screening, testing and management  
29  
30 while acknowledging the controversies that exist about the management of AS. The intent of  
31  
32 this review is to draw attention to this important entity and to allow the reader to create an  
33  
34 informed and practical approach to the management of their patients at risk.  
35  
36  
37  
38  
39  
40

### 41 **Adrenal suppression in children treated with systemic glucocorticoids**

42

43  
44 Both clinical and biochemical evidence of AS have been well described in children following  
45  
46 discontinuation of therapeutic doses of systemic GCs.<sup>8,10,11</sup> Shorter term systemic GC exposure  
47  
48 is associated with more transient AS.<sup>12,13</sup> In practice, exposure for greater than 2 weeks is used  
49  
50 as a threshold for risk of clinically important AS.<sup>4</sup> Duration of AS following prolonged GC  
51  
52 exposure has been reported to be up to 2 years.<sup>7,10</sup> Symptomatic AS including adrenal crisis and  
53  
54  
55  
56  
57  
58  
59  
60

1  
2  
3 death are well documented related to systemic GC therapy.<sup>3,6,11,14</sup> Higher dose, longer duration  
4 and timing of administration of GCs (evening vs. morning) are theoretical risks.<sup>15,16</sup>  
5  
6

7 We did not find literature exploring risk of repeated intermittent GC exposure.  
8  
9

### 10 **Adrenal suppression in children treated for asthma with inhaled corticosteroids**

11

12  
13 ICS therapy, when used according to current guidelines,<sup>17,18</sup> is rarely associated with clinically  
14 significant AS. National asthma guidelines recommend consultation with asthma specialists if  
15 children or adolescents meet criteria for treatment with high (or moderate) dose ICS therapy.<sup>17,18</sup>  
16  
17

18  
19  
20  
21 There have been more than 90 case reports in the literature of adrenal crisis or death secondary to  
22 ICS use for the treatment of asthma.<sup>1,19-21</sup> Pharmacokinetic and pharmacodynamic properties  
23 and dose, in addition to ICS mode of delivery, play a role in the risk of AS<sup>2</sup> and therefore dose  
24 thresholds for AS risk differ between medications (see Table 2). Clinicians can consider the use  
25 of high dose ICS therapy as an important risk factor for AS, as most doses associated with  
26 increased risk correspond to high dose ICS therapy as defined by national asthma  
27 guidelines.<sup>1,6,9,17,18,22-24</sup> An important exception to this rule is fluticasone, an ICS that has been  
28 associated with the majority of cases of symptomatic AS in doses of 500 µg daily or greater  
29 (500 µg is moderate dosing for children ≥ 12 years in some guidelines).<sup>1,2,6,20,25-27</sup> . In addition,  
30 ciclesonide, a comparatively new ICS, appears to have reduced AS risk,<sup>2,17,18,21,25,28,29</sup> although  
31 there is insufficient evidence about risk of AS at high doses.  
32  
33  
34  
35  
36  
37  
38  
39  
40  
41  
42  
43  
44  
45  
46

47 In addition to high dose ICS therapy, exposure to courses of systemic GCs for treatment of  
48 asthma put children at risk of AS.<sup>1,2,25,28</sup> Achieving good asthma control with skilled use of  
49 controller therapy, including appropriately dosed ICS, will prevent exacerbations and reduce the  
50 need for long-term and/or repeated courses of GCs.<sup>30</sup> Other possible risk factors include  
51  
52  
53  
54  
55  
56  
57  
58  
59  
60

1  
2  
3 concomitant intranasal corticosteroids, low BMI and cumulative glucocorticoid exposure.<sup>2,6</sup>  
4  
5 Duration of ICS exposure has not been found to be a risk factor, however most studies have  
6  
7 looked at exposures of 6 weeks or more. A recent genome-wide association study suggests that a  
8  
9 common genetic variant might lead to susceptibility to AS in patients exposed to ICS but further  
10  
11 study is needed to support this finding.<sup>31</sup>  
12  
13

14  
15 Clinicians need to be aware of the ICS doses contained in combination inhalers and should  
16  
17 consider risk based on the ICS component (see Table 2).  
18  
19

### 20 21 **Adrenal suppression in children treated with other forms of glucocorticoids**

22

23  
24 Studies of the risk of AS related to intranasal corticosteroids alone have had variable results  
25  
26 although use in conjunction with ICS is a risk factor.<sup>32,33,34</sup>  
27  
28

29  
30 While the use of low to moderate potency topical corticosteroids is rarely associated with a risk  
31  
32 of AS<sup>35</sup>, there have been case reports of symptomatic AS and cushingoid features in infants  
33  
34 receiving potent topical GCs for >1 month with misuse of the medication.<sup>36</sup> Symptomatic AS  
35  
36 associated with cushingoid features has also been reported with ocular GCs.<sup>37</sup> AS has been  
37  
38 associated with intra-articular GCs in adults.<sup>38</sup>  
39  
40

41  
42 Studies suggest that children receiving swallowed ICS for eosinophilic esophagitis or  
43  
44 inflammatory bowel disease are at risk of AS.<sup>6,39,40</sup>  
45  
46

### 47 **Medications potentiating systemic effects of glucocorticoids**

48

49  
50 CYP3A4 inhibitors, including several antiretroviral medications, antifungal agents and select  
51  
52 antidepressants, prolong the biologic half-life of GCs. These medications have been reported (a)  
53  
54



1  
2  
3 in several cases of symptomatic AS associated with relatively low doses of ICS, and (b) with a  
4 prolonged duration of AS following systemic GC exposure.<sup>8,41,42</sup>  
5  
6  
7

### 8 **Glucocorticoid taper**

9  
10  
11 There is no evidence to support a specific approach to GC taper for the prevention of AS.<sup>3,43</sup> It  
12 has been demonstrated that a gradual GC taper does not prevent AS.<sup>10</sup> GCs should be tapered or  
13 discontinued at a rate dictated by the underlying condition in order to maintain disease remission;  
14 if not indicated for prevention of disease relapse, a prolonged taper should be avoided to prevent  
15 unnecessary GC exposure. Physiological GC replacement should prevent symptoms of AS,<sup>4</sup> so  
16 testing of the HPA axis prior to discontinuing or tapering GCs below a physiological dose  
17 (<8mg/m<sup>2</sup>/day hydrocortisone equivalent) should be considered in children who have received  
18 prolonged courses of GCs (Table 5 -GC dose equivalencies). Symptoms of GC withdrawal can  
19 occur during a rapid taper and may mimic symptoms of AS despite biochemical evidence of  
20 HPA system integrity or adequate GC replacement.<sup>44</sup> Clinicians need to be aware of this  
21 possibility, evaluate for possible AS, and modify their taper accordingly.  
22  
23  
24  
25  
26  
27  
28  
29  
30  
31  
32  
33  
34  
35  
36  
37  
38

### 39 **Testing for adrenal suppression**

40  
41  
42 Testing for adrenal insufficiency (AI), including AS, is a challenge for clinicians due to lack of  
43 standardization of cortisol assays and lack of clinical association with established cortisol  
44 thresholds used for diagnosis.<sup>45,46</sup> Of particular note are newer generation assays including the  
45 Roche Cortisol II immunoassay which is reported to measure cortisol levels approximately 30%  
46 lower than the older Roche immunoassay.<sup>47</sup> Clinicians must be aware of the thresholds  
47 associated with the assay used in their local laboratory.  
48  
49  
50  
51  
52  
53  
54  
55  
56  
57  
58  
59  
60

1  
2  
3  
4  
5  
6 Cortisol thresholds cited within this section are reported from studies that have employed older  
7  
8 generation immunoassays and as such, need to be interpreted with caution. First morning  
9  
10 cortisol (7-9 am) is often used in screening for AI. A first morning cortisol is specific for  
11  
12 diagnosis of AI if  $\leq 100$  nmol/L ( $\leq 3.6$   $\mu\text{g/dL}$ ) in individuals with a normal sleep-wake cycle in  
13  
14 whom GCs are withheld for *at least* 24 hours.<sup>48,49</sup> GCs with longer duration of action must be  
15  
16 held for longer than 24 hours. Clinicians must assess the safety of discontinuing GC therapy for  
17  
18 testing and modify their approach accordingly (see Table 3). Since cortisol production is under  
19  
20 circadian regulation, a low morning cortisol is poorly predictive of AS in infants and children  
21  
22 who do not have a regular sleep-wake cycle, and dynamic testing is indicated.<sup>50</sup> A first  
23  
24 morning cortisol value of  $\geq 350 - 500$  nmol/L ( $\geq 13-18$   $\mu\text{g/dL}$ ) can predict normal HPA axis  
25  
26 function.<sup>49,51,52</sup> The Pediatric Endocrine Society Pharmacy and Therapeutics guideline about  
27  
28 endocrine side effects of ICS suggests that a first morning cortisol value of 275 nmol/L  
29  
30 (10  $\mu\text{g/dL}$ ) may be considered as a screening threshold in asymptomatic patients<sup>2</sup>. However,  
31  
32 there is no single absolute cutoff for morning cortisol that can be used to confidently rule in or  
33  
34 out AS.  
35  
36  
37  
38  
39  
40  
41  
42

43 Provocative testing is typically required for diagnosis of central AI including AS. Both standard  
44  
45 dose (250  $\mu\text{g}$ ) and low dose (1  $\mu\text{g}$ ) ACTH stimulation tests are used in clinical practice for  
46  
47 evaluation of central AI with significant debate about which is superior, some studies suggesting  
48  
49 that the low dose stimulation test (LDST) is significantly more sensitive but less specific with  
50  
51 other studies not supporting this finding.<sup>46,51,53</sup> Peak cortisol thresholds of 500-600 nmol/L (18-  
52  
53 22  $\mu\text{g/dL}$ ) are commonly used to rule out AI but vary between studies and institutions; clinicians  
54  
55  
56  
57  
58  
59  
60

1  
2  
3 must therefore refer to their local protocols for guidance. Appropriate preparation and  
4  
5 procedures for testing of the HPA axis are required (See Table 3).  
6  
7

### 8 **Glucocorticoid replacement**

9  
10  
11 Cortisol production is significantly higher during physiological stress in healthy individuals.<sup>54</sup>  
12  
13 Individuals with AI are at risk of adrenal crisis during illness, surgery or injury. Gastrointestinal  
14  
15 illness is the most common precipitant of adrenal crisis.<sup>55</sup> In practice, stress dosing of GCs is  
16  
17 provided during physiological stresses in order to prevent adrenal crisis in children with AI  
18  
19 (Table 4).<sup>11,14,56</sup> There is currently insufficient data to recommend GC coverage during  
20  
21 moderate-to-extreme activity or emotional stress.<sup>4,57</sup>  
22  
23  
24  
25

26 Hydrocortisone is the medication of choice for stress dosing, particularly during adrenal crisis  
27  
28 because of its mineralocorticoid effect (Table 4).<sup>55</sup> However, in practice, while receiving active  
29  
30 systemic GC therapy, stress dosing for moderate illness is often provided using the same form of  
31  
32 GC that is being used to treat disease, rather than hydrocortisone (see Table 5 for relative  
33  
34 potencies).  
35  
36  
37

38 Children with symptomatic AS require daily physiologic GC replacement<sup>2</sup> (Table 4). Daily GC  
39  
40 replacement is also an important consideration in children with clear biochemical evidence of  
41  
42 AS<sup>58</sup>, even in the absence of well-defined symptoms, but remains controversial among pediatric  
43  
44 endocrinologists, with no literature supporting or refuting this approach. Hydrocortisone, with  
45  
46 its short half-life, is the drug of choice for daily replacement with dosing of approximately  
47  
48 8mg/m<sup>2</sup>/day considered to be physiological.<sup>59,60</sup> While three times daily (TID) hydrocortisone  
49  
50 dosing is standard of care in primary AI,<sup>60</sup> many endocrinologists provide once or twice daily  
51  
52  
53  
54  
55  
56  
57  
58  
59  
60

1  
2  
3 dosing in AS, with higher doses in the morning to more closely mimic circadian regulation and  
4  
5 to reduce the ongoing suppression of endogenous morning cortisol production. There is no  
6  
7 evidence to support a specific approach. Clinicians must be aware of the short half-life of  
8  
9 hydrocortisone and consider TID dosing if a child remains symptomatic.<sup>4,61,62</sup>  
10  
11

12  
13 Strong CYP3A4 inducers, such as phenobarbital, carbamazepine or rifampicin, may decrease the  
14  
15 serum concentration of GCs requiring an awareness of the need for dose adjustment in the  
16  
17 context of ongoing symptoms or poor response to stress dosing in the management of AS.<sup>63,64</sup>  
18  
19

### 20 21 **How can we reduce the risk of AS and adrenal crisis?** 22

23  
24 Despite being largely preventable, morbidity and mortality associated with AS continue to be  
25  
26 reported. We suggest that the following measures be considered to reduce this risk:  
27  
28

- 29  
30 1. Clinician education and awareness about the risk of AS including an understanding of the  
31  
32 relatively high frequency of AS in patients being treated with *high dose* ICS therapy  
33  
34
- 35  
36 2. Clinicians should prescribe the lowest effective dose of GCs with regular re-evaluation.  
37  
38 If once-daily GC dosing is appropriate, GCs should be given in the morning to minimize  
39  
40 suppression of the HPA axis.  
41  
42
- 43  
44 3. Families should be educated about the risk of AS with an understanding that the benefits  
45  
46 of GC therapy outweigh the risks, and that medication adherence and clinical follow-up  
47  
48 are the best preventative measures for symptomatic AS.  
49  
50  
51  
52  
53  
54  
55  
56  
57  
58  
59  
60

- 1  
2  
3 4. All children with possible signs or symptoms of AS, including poor growth, and with  
4  
5 current or recent history of GC/ICS use should be tested for AS. Symptomatic children  
6  
7 with biochemical evidence of AS should be treated with both daily and stress dosing GC.  
8  
9
- 10  
11 5. Stress dosing should be provided for critical illness or major surgery, in all children being  
12  
13 actively treated with GCs and should be *considered* in all children who have recently  
14  
15 discontinued GC therapy (up to a year for those with prolonged exposure) unless they  
16  
17 have been proven to have a normal HPA axis. Cortisol should be drawn prior to  
18  
19 initiating stress dosing during a critical illness if the diagnosis of AS is not confirmed.  
20  
21
- 22  
23 6. Screening of children at high risk of AS should be considered. An alternative approach  
24  
25 may be to provide empiric stress dosing once GC doses are tapered to <30 mg/m<sup>2</sup>/day of  
26  
27 hydrocortisone equivalent and for up to 6-12 months following GC discontinuation.  
28  
29 There is no evidence to support a specific approach to asymptomatic children with AS.  
30  
31
- 32  
33 7. Children with biochemical evidence of AS should receive stress dosing. Treatment with  
34  
35 daily GC dosing should be considered.  
36  
37
- 38  
39 8. Families of children with proven or suspected AS should be educated about stress dosing  
40  
41 (Table 4) and provided with a stress dosing card or handout outlining doses, indications  
42  
43 for stress dosing and indications to seek emergency help. Wearing a medical alert  
44  
45 identification should be considered.  
46  
47
- 48  
49 9. Family/caregiver education for administration of intramuscular (IM) hydrocortisone for  
50  
51 use during severe illness or when unable to tolerate oral therapy, should be considered for  
52  
53 all children with possible or proven AS, especially in those who live or travel remotely.  
54  
55

## Conclusions

While relatively uncommon, symptomatic AS can be associated with significant morbidity and mortality. Symptomatic AS can be prevented by responsible GC prescribing and follow-up, recognition of signs and symptoms including poor growth, and screening and treatment of children at increased risk. Education of clinicians and at-risk patients/parents about AS is integral to reducing morbidity associated with this iatrogenic condition. Until further evidence is available, consultation with an endocrinologist should be considered when there is uncertainty about how to approach the management of a child or adolescent with possible or proven AS. Clinicians and families should not lose sight of the fact that GCs are essential for the management of many pediatric conditions and that the risk of AS should not be a barrier to their use.

**Acknowledgements:** We would like to thank Victor Konji (PhD) for his assistance with our literature review and article referencing.

**Competing interests:** AA has received honoraria as a consultant to Reveragen. HK has served as a speaker and/or advisor for ALK, Aralez, Astrazeneca, CSL Behring, Shire, Novartis, Pediapharm, Stallergenes, Kaleo, Sanofi, Pfizer, and Mylan.

**Table 1. Presenting symptoms and signs associated with Adrenal Suppression**

| <b>Symptoms/Signs of Possible Adrenal Suppression</b> |
|-------------------------------------------------------|
| Poor linear growth*                                   |
| Poor weight gain                                      |
| Anorexia                                              |
| Nausea/vomiting                                       |
| Malaise                                               |
| Weakness/fatigue                                      |
| Headache                                              |
| Abdominal pain                                        |
| Myalgia/arthralgia                                    |
| Psychiatric symptoms                                  |
| <b>Signs of Adrenal Crisis</b>                        |
| Hypotension                                           |
| Hypoglycemia (seizure/coma)                           |
| <b>Signs Associated with Adrenal Suppression</b>      |
| Cushingoid features                                   |

\*Poor linear growth has been reported in close to 50% of patients with symptomatic AS.<sup>6</sup> Table adapted from Ahmet et al 2011.<sup>25</sup>

**Table 2. ICS type and dose thresholds associated with increased Adrenal Suppression risk<sup>a</sup>**

| Corticosteroid                                                        | Trade Name                                                | Screening threshold <sup>b</sup><br>( $\mu\text{g}/\text{day}$ ) |                                      |
|-----------------------------------------------------------------------|-----------------------------------------------------------|------------------------------------------------------------------|--------------------------------------|
|                                                                       |                                                           | Canadian/European<br>Dosing                                      | American Dosing                      |
| Beclomethasone<br>dipropionate HFA <sup>22</sup>                      | QVAR                                                      | >400                                                             | >320                                 |
| Budesonide DPI <sup>6,22</sup><br>Budesonide and formoterol           | Pulmicort<br>Turbuhaler<br>Symbicort                      | $\geq 800$                                                       | $\geq 800$                           |
| Ciclesonide <sup>c</sup>                                              | Alvesco                                                   | >400                                                             | >320                                 |
| Fluticasone propionate <sup>1,6,9</sup><br>Fluticasone and salmeterol | Flovent MDI and<br>spacer; Flovent<br>Diskus;<br>Advair   | $\geq 500$                                                       | $\geq 440$ (HFA)<br>$\geq 500$ (DPI) |
| Fluticasone furoate DPI <sup>23</sup>                                 | Arnuity Ellipta <sup>d</sup><br>Breo Ellipta <sup>d</sup> | $\geq 100$                                                       | $\geq 100$                           |
| Mometasone DPI <sup>24</sup><br>Mometasone formoterol                 | Asmanex<br>Twisthaler<br>Zenhale                          | $\geq 800$                                                       | $\geq 800$                           |

<sup>a</sup>Threshold doses are based on the best available literature. Where no specific evidence for dose threshold for AS risk in pediatrics was available, thresholds cited are from adult studies or represent high dose therapy as per national asthma guidelines.<sup>17,18</sup>



1  
2  
3 <sup>b</sup> In the US, inhaler dose is based on the amount leaving the mouthpiece, rather than the amount  
4 leaving the canister, this accounts for differences in listed (but not actual) doses.  
5

6  
7 <sup>c</sup> While ciclesonide has been demonstrated to have reduced risk of systemic side effects, there is a  
8 paucity of literature about the risk of AS with high doses and as such, consideration of screening  
9 may be made at these suggested doses.  
10

11 <sup>d</sup> Fluticasone Furoate (Arnuity Ellipta and Breo Ellipta) contain a new potent ICS. 100µg daily is  
12 equivalent to 500µg daily of fluticasone. This formulation has a high potential risk for AS. <sup>23</sup>  
13  
14  
15  
16  
17  
18  
19  
20  
21  
22  
23  
24  
25  
26  
27  
28  
29  
30  
31  
32  
33  
34  
35  
36  
37  
38  
39  
40  
41  
42  
43  
44  
45  
46  
47  
48  
49  
50  
51  
52  
53  
54  
55  
56  
57  
58  
59  
60

**Table 3. Tests of HPA axis function: Considerations for testing**

| Procedure                              | Considerations for testing                                                                                                                                                                                                                                                                                                                                                                                                                                                                                                                      |
|----------------------------------------|-------------------------------------------------------------------------------------------------------------------------------------------------------------------------------------------------------------------------------------------------------------------------------------------------------------------------------------------------------------------------------------------------------------------------------------------------------------------------------------------------------------------------------------------------|
| All Tests                              | <ul style="list-style-type: none"> <li>• Hold all oral GCs prior to the test based on their duration of action<sup>a</sup>:               <ul style="list-style-type: none"> <li>○ hydrocortisone x 24 hours,</li> <li>○ prednisone x 48 hours,</li> <li>○ dexamethasone x 72 hours</li> </ul> </li> <li>• Consideration of a switch to hydrocortisone prior to testing should be considered in children at high risk of AS<sup>a</sup></li> <li>• Hold ICS the evening and morning prior to the test if patient stable <sup>b</sup></li> </ul> |
| First morning cortisol <sup>c</sup>    | <ul style="list-style-type: none"> <li>• 7-9 am test (Before 8 am is optimal)</li> <li>• Tests drawn after 9 am must be repeated if abnormal</li> </ul>                                                                                                                                                                                                                                                                                                                                                                                         |
| Low dose ACTH stimulation <sup>h</sup> | <ul style="list-style-type: none"> <li>• Perform test in the morning<sup>65</sup></li> <li>• 1µg corticotropin analog <sup>f,5</sup></li> <li>• Minimal tubing length for administration of corticotropin reduces the possibility of adherence to plastic tubing<sup>65</sup></li> <li>• Cortisol drawn at 0, 15, 30 and 60 minutes for peak levels<sup>g</sup>:<br/>66,67</li> </ul>                                                                                                                                                           |
| Standard dose ACTH stimulation         | <ul style="list-style-type: none"> <li>• 250µg<sup>h</sup> corticotropin analog</li> <li>• Cortisol drawn at 0, 30 and 60 minutes</li> <li>• Currently no evidence to support morning vs afternoon testing</li> </ul>                                                                                                                                                                                                                                                                                                                           |

1  
2  
3 <sup>a</sup>In some cases, it may be unsafe to hold medications for the duration required. Consideration of  
4 a wean to physiological hydrocortisone dosing may be made in some circumstances to facilitate  
5 testing and address safety concerns.

6 <sup>b</sup>In children where it is unsafe to hold evening ICS dose, abnormal cortisol levels must be  
7 interpreted with caution.

8 <sup>c</sup>In infants and children with disrupted sleep-wake cycles, an abnormal first morning cortisol is  
9 not diagnostic of AS. Provocative testing is indicated.

10 <sup>d</sup>Provocative testing is required to definitively rule in or out AS

11 <sup>e</sup>Careful dilution and timely administration of corticotropin is required <sup>65</sup>

12 <sup>f</sup>Protocols for Low Dose ACTH stimulation tests including timing of cortisol samples may vary  
13 between institutions.

14 <sup>g</sup>For infants: corticotropin dose =15µg/kg up to a maximum dose of 250µg  
15  
16  
17  
18  
19  
20  
21  
22  
23  
24  
25  
26  
27  
28  
29  
30  
31  
32  
33  
34  
35  
36  
37  
38  
39  
40  
41  
42  
43  
44  
45  
46  
47  
48  
49  
50  
51  
52  
53  
54  
55  
56  
57  
58  
59  
60

**Table 4. Glucocorticoid replacement and stress dosing**

| Indication                                                                                                                                                | Glucocorticoid dose <sup>a,b</sup>                                                                                                                                                                                                                                                |
|-----------------------------------------------------------------------------------------------------------------------------------------------------------|-----------------------------------------------------------------------------------------------------------------------------------------------------------------------------------------------------------------------------------------------------------------------------------|
| Adrenal crisis, severe illness or severe injury                                                                                                           | Hydrocortisone 100 mg/m <sup>2</sup> (max 100 mg) IV/IM stat, then 100 mg/m <sup>2</sup> (max 200 mg) divided q 6 hours or by continuous infusion                                                                                                                                 |
| Major Surgery                                                                                                                                             | Hydrocortisone 50-100 mg/m <sup>2</sup> IV (max 100 mg) pre-op, then 100 mg/m <sup>2</sup> /24 hrs IV (max 200 mg) by continuous infusion or divided q 6 hrs                                                                                                                      |
| Minor to Moderate Surgery or procedure requiring general anesthesia                                                                                       | Hydrocortisone 50 mg/m <sup>2</sup> IV (max 100 mg) pre-op, then as indicated by clinical status (typically moderate illness dosing x 1-2 days)                                                                                                                                   |
| Moderate Illness including fever $\geq 38.5^{\circ}$ , vomiting, diarrhea, severe head cold with fatigue or injury<br><i>Able to tolerate orally</i>      | 30 mg/m <sup>2</sup> /day hydrocortisone equivalent <sup>c</sup> divided TID until resolution of symptoms<br>Duration >3 days should be reassessed by the health care team <sup>d</sup>                                                                                           |
| Moderate Illness including fever $\geq 38.5^{\circ}$ , vomiting, diarrhea, severe head cold with fatigue or injury<br><i>Inability to tolerate orally</i> | Hydrocortisone must be given parenterally<br>30-50 mg/m <sup>2</sup> /day hydrocortisone divided q 6 hourly IV or q 8 hourly IM<br>Consult endocrinology to re-assess parenteral dose if the child is still unable to tolerate orally after 24 hours of parenteral administration |
| Severe illness or moderate illness and unable to tolerate orally BEFORE arriving in ED                                                                    | Consider teaching administration of IM hydrocortisone in all patients with AS<br>Families who do not have rapid access to a hospital ED or who are planning remote travel (airplane, camping, etc.) should be taught administration of IM hydrocortisone                          |
| <b>Daily Physiologic Hydrocortisone Dosing</b>                                                                                                            |                                                                                                                                                                                                                                                                                   |
| 8 mg/m <sup>2</sup> /day hydrocortisone daily (divided BID-TID if symptomatic with higher dose in the morning)                                            |                                                                                                                                                                                                                                                                                   |

1  
2  
3  
4 <sup>a</sup>Poor evidence for pediatric dosing. Recommendations based on expert opinion and best  
5 available evidence. <sup>4,60-62</sup>  
6

7  
8 <sup>b</sup>Dosing may need to be adjusted in children receiving CYP3A4 Inducers. Endocrinology should  
9 be consulted in these cases.  
10

11 <sup>c</sup>In children on active therapy in doses  $\geq 30$  mg/m<sup>2</sup>/day hydrocortisone equivalent  
12 ( $\geq 7.5$  mg/m<sup>2</sup>/day prednisone), stress dosing for mild-moderate illness can be achieved by dividing  
13 the therapeutic prednisone dose to be given BID (i.e. therapeutic dose is sufficient for stress  
14 coverage). Once therapeutic GC is no longer needed, stress dosing should be provided using  
15 hydrocortisone.  
16  
17

18 <sup>d</sup>Frequent or prolonged duration of stress dosing can contribute to adrenal suppression. Stress  
19 dosing is not required for very mild symptoms such as a persistent runny nose.  
20  
21  
22  
23  
24  
25  
26  
27  
28  
29  
30  
31  
32  
33  
34  
35  
36  
37  
38  
39  
40  
41  
42  
43  
44  
45  
46  
47  
48  
49  
50  
51  
52  
53  
54  
55  
56  
57  
58  
59  
60

**Table 5. Relative glucocorticoid potencies<sup>a</sup>**

|                           | Anti-Inflammatory Potency | HPA Suppression Potency <sup>b</sup> | Duration of action (hours) |
|---------------------------|---------------------------|--------------------------------------|----------------------------|
| Hydrocortisone (cortisol) | 1                         | 1                                    | 8 to 12                    |
| Prednisone                | 4                         | 4                                    | 12 to 36                   |
| Prednisolone              | 4                         | 4                                    | 12 to 36                   |
| Methylprednisolone        | 5                         | 5                                    | 12 to 36                   |
| Dexamethasone             | 30                        | 50 (17-100)                          | 36 to 72                   |

<sup>a</sup>HPA suppression potencies should be used when calculating hydrocortisone equivalent doses for evaluation of AS risk

<sup>b</sup>Available data about relative HPA suppression potency is limited and widely variable. Studies of growth suppressive effects of prednisone, prednisolone, methylprednisolone and dexamethasone suggest that secondary effects on growth relative to anti-inflammatory effects may be significantly higher. References <sup>68-70</sup>

**References:**

1. Todd GR, Acerini CL, Ross-Russell R, Zahra S, Warner JT, McCance D. Survey of adrenal crisis associated with inhaled corticosteroids in the United Kingdom. *Arch Dis Child* 2002;87:457-61.
2. Kapadia CR, Nebesio TD, Myers SE, et al. Endocrine Effects of Inhaled Corticosteroids in Children. *JAMA Pediatr* 2016;170:163-70.
3. Dinsen S, Baslund B, Klose M, et al. Why glucocorticoid withdrawal may sometimes be as dangerous as the treatment itself. *Eur J Intern Med* 2013;24:714-20.
4. Shulman DI, Palmert MR, Kemp SF. Adrenal insufficiency: still a cause of morbidity and death in childhood. *Pediatrics* 2007;119:e484-94.
5. Puar TH, Stikkelbroeck NM, Smans LC, Zelissen PM, Hermus AR. Adrenal Crisis: Still a Deadly Event in the 21st Century. *Am J Med* 2016;129:339 e1-9.
6. Goldbloom EB, Mokashi A, Cummings EA, et al. Symptomatic adrenal suppression among children in Canada. *Arch Dis Child* 2017;102:338-9.
7. Wildi-Runge S, Deladoey J, Belanger C, et al. A search for variables predicting cortisol response to low-dose corticotropin stimulation following suprathreshold doses of glucocorticoids. *The Journal of pediatrics* 2013;163:484-8.
8. Rensen N, Gemke RJ, van Dalen EC, Rotteveel J, Kaspers GJ. Hypothalamic-pituitary-adrenal (HPA) axis suppression after treatment with glucocorticoid therapy for childhood acute lymphoblastic leukaemia. *Cochrane Database Syst Rev* 2017;11:CD008727.
9. Smith RW, Downey K, Gordon M, et al. Prevalence of hypothalamic-pituitary-adrenal axis suppression in children treated for asthma with inhaled corticosteroid. *Paediatr Child Health* 2012;17:e34-9.
10. Ahmet A, Brienza V, Tran A, et al. Frequency and Duration of Adrenal Suppression Following Glucocorticoid Therapy in Children With Rheumatic Diseases. *Arthritis Care Res (Hoboken)* 2017;69:1224-30.
11. Einaudi S, Bertorello N, Masera N, et al. Adrenal axis function after high-dose steroid therapy for childhood acute lymphoblastic leukemia. *Pediatr Blood Cancer* 2008;50:537-41.
12. Zora JA, Zimmerman D, Carey TL, O'Connell EJ, Yunginger JW. Hypothalamic-pituitary-adrenal axis suppression after short-term, high-dose glucocorticoid therapy in children with asthma. *J Allergy Clin Immunol* 1986;77:9-13.
13. Henzen C, Suter A, Lerch E, Urbinelli R, Schorno XH, Briner VA. Suppression and recovery of adrenal response after short-term, high-dose glucocorticoid treatment. *Lancet* 2000;355:542-5.
14. Rix M, Birkebaek NH, Rosthoj S, Clausen N. Clinical impact of corticosteroid-induced adrenal suppression during treatment for acute lymphoblastic leukemia in children: a prospective observational study using the low-dose adrenocorticotropin test. *The Journal of pediatrics* 2005;147:645-50.
15. Hawcutt DB, Jorgensen AL, Wallin N, et al. Adrenal responses to a low-dose short synacthen test in children with asthma. *Clinical endocrinology* 2015;82:648-56.
16. Adam HM. Fever and host responses. *Pediatr Rev* 1996;17:330-1.
17. Loughheed MD, Lemiere C, Ducharme FM, et al. Canadian Thoracic Society 2012 guideline update: diagnosis and management of asthma in preschoolers, children and adults. *Can Respir J* 2012;19:127-64.

18. [www.nhlbi.nih.gov/guidelines/asthma](http://www.nhlbi.nih.gov/guidelines/asthma). National Heart, Lung, and Blood Institute. National Asthma Education and Prevention Program. Expert Panel Report 3: Guidelines for the Diagnosis and Management of Asthma 2007:314. Access date: March 26, 2019.
19. Donaldson MD, Morrison C, Lees C, et al. Fatal and near-fatal encephalopathy with hyponatraemia in two siblings with fluticasone-induced adrenal suppression. *Acta Paediatr* 2007;96:769-72.
20. Schwartz RH, Neacsu O, Ascher DP, Alpan O. Moderate dose inhaled corticosteroid-induced symptomatic adrenal suppression: case report and review of the literature. *Clinical pediatrics* 2012;51:1184-90.
21. Heller MK, Laks J, Kovesi TA, Ahmet A. Reversal of adrenal suppression with ciclesonide. *J Asthma* 2010;47:337-9.
22. Ninan TK, Reid IW, Carter PE, Smail PJ, Russell G. Effects of high doses of inhaled corticosteroids on adrenal function in children with severe persistent asthma. *Thorax* 1993;48:599-602.
23. Lotvall J, Bleecker ER, Busse WW, et al. Efficacy and safety of fluticasone furoate 100 mug once-daily in patients with persistent asthma: a 24-week placebo and active-controlled randomised trial. *Respir Med* 2014;108:41-9.
24. Fardon TC, Lee DK, Haggart K, McFarlane LC, Lipworth BJ. Adrenal suppression with dry powder formulations of fluticasone propionate and mometasone furoate. *Am J Respir Crit Care Med* 2004;170:960-6.
25. Ahmet A, Kim H, Spier S. Adrenal suppression: A practical guide to the screening and management of this under-recognized complication of inhaled corticosteroid therapy. *Allergy Asthma Clin Immunol* 2011;7:13.
26. Zollner EW. Hypothalamic-pituitary-adrenal axis suppression in asthmatic children on inhaled corticosteroids (Part 2)--the risk as determined by gold standard adrenal function tests: a systematic review. *Pediatr Allergy Immunol* 2007;18:469-74.
27. Patel L, Wales JK, Kibirige MS, Massarano AA, Couriel JM, Clayton PE. Symptomatic adrenal insufficiency during inhaled corticosteroid treatment. *Arch Dis Child* 2001;85:330-4.
28. Lipworth BJ, Kaliner MA, LaForce CF, et al. Effect of ciclesonide and fluticasone on hypothalamic-pituitary-adrenal axis function in adults with mild-to-moderate persistent asthma. *Ann Allergy Asthma Immunol* 2005;94:465-72.
29. Liddell BS, Oberlin JM, Hsu DP. Inhaled corticosteroid related adrenal suppression detected by poor growth and reversed with ciclesonide. *J Asthma* 2017;54:99-104.
30. Guilbert TW, Morgan WJ, Zeiger RS, et al. Long-term inhaled corticosteroids in preschool children at high risk for asthma. *The New England journal of medicine* 2006;354:1985-97.
31. Hawcutt DB, Francis B, Carr DF, et al. Susceptibility to corticosteroid-induced adrenal suppression: a genome-wide association study. *Lancet Respir Med* 2018;6:442-50.
32. Patel D, Ratner P, Clements D, Wu W, Faris M, Philpot E. Lack of effect on adult and adolescent hypothalamic-pituitary-adrenal axis function with use of fluticasone furoate nasal spray. *Ann Allergy Asthma Immunol* 2008;100:490-6.
33. Skoner DP, Berger WE, Gawchik SM, Akbary A, Qiu C. Intranasal triamcinolone and growth velocity. *Pediatrics* 2015;135:e348-56.



34. Zollner EW, Lombard C, Galal U, Hough S, Irusen E, Weinberg E. Hypothalamic-pituitary-adrenal axis suppression in asthmatic children on inhaled and nasal corticosteroids--more common than expected? *J Pediatr Endocrinol Metab* 2011;24:529-34.
35. Wood Heckman LK, Davallow Ghajar L, Conaway M, Rogol AD. Evaluation of Hypothalamic-Pituitary-Adrenal Axis Suppression following Cutaneous Use of Topical Corticosteroids in Children: A Meta-Analysis. *Horm Res Paediatr* 2018;89:389-96.
36. Bulus AD, Andiran N, Kocak M. Cushing's syndrome: hidden risk in usage of topical corticosteroids. *J Pediatr Endocrinol Metab* 2014;27:977-81.
37. Chiang MY, Sarkar M, Koppens JM, Milles J, Shah P. Exogenous Cushing's syndrome and topical ocular steroids. *Eye (Lond)* 2006;20:725-7.
38. Johnston PC, Lansang MC, Chatterjee S, Kennedy L. Intra-articular glucocorticoid injections and their effect on hypothalamic-pituitary-adrenal (HPA)-axis function. *Endocrine* 2015;48:410-6.
39. Ahmet A, Benchimol EI, Goldbloom EB, Barkey JL. Adrenal suppression in children treated with swallowed fluticasone and oral viscous budesonide for eosinophilic esophagitis. *Allergy Asthma Clin Immunol* 2016;12:49: eCollection 2016.
40. Cohen SA, Aloï M, Arumugam R, et al. Enteric-coated budesonide for the induction and maintenance of remission of Crohn's disease in children. *Curr Med Res Opin* 2017;33:1261-8.
41. Foisy MM, Yakiwchuk EM, Chiu I, Singh AE. Adrenal suppression and Cushing's syndrome secondary to an interaction between ritonavir and fluticasone: a review of the literature. *HIV medicine* 2008;9:389-96.
42. Bornstein SR. Predisposing factors for adrenal insufficiency. *The New England journal of medicine* 2009;360:2328-39.
43. Richter B, Neises G, Clar C. Glucocorticoid withdrawal schemes in chronic medical disorders. A systematic review. *Endocrinology and metabolism clinics of North America* 2002;31:751-78.
44. Dixon RB, Christy NP. On the various forms of corticosteroid withdrawal syndrome. *Am J Med* 1980;68:224-30.
45. Hawley JM, Owen LJ, Lockhart SJ, et al. Serum Cortisol: An Up-To-Date Assessment of Routine Assay Performance. *Clin Chem* 2016;62:1220-9.
46. Ng SM, Agwu JC, Dwan K. A systematic review and meta-analysis of Synacthen tests for assessing hypothalamic-pituitary-adrenal insufficiency in children. *Arch Dis Child* 2016;101:847-53.
47. Kline GA, Buse J, Krause RD. Clinical implications for biochemical diagnostic thresholds of adrenal sufficiency using a highly specific cortisol immunoassay. *Clin Biochem* 2017;50:475-80.
48. Maguire AM, Biesheuvel CJ, Ambler GR, Moore B, McLean M, Cowell CT. Evaluation of adrenal function using the human corticotrophin-releasing hormone test, low dose Synacthen test and 9am cortisol level in children and adolescents with central adrenal insufficiency. *Clinical endocrinology* 2008;68:683-91.
49. Le Roux CW, Meeran K, Alaghband-Zadeh J. Is a 0900-h serum cortisol useful prior to a short synacthen test in outpatient assessment? *Ann Clin Biochem* 2002;39:148-50.
50. Kazlauskaitė R, Maghnie M. Pitfalls in the diagnosis of central adrenal insufficiency in children. *Endocr Dev* 2010;17:96-107.

- 1  
2  
3 51. Kazlauskaitė R, Evans AT, Villabona CV, et al. Corticotropin tests for hypothalamic-pituitary-adrenal insufficiency: a metaanalysis. *The Journal of clinical endocrinology and metabolism* 2008;93:4245-53.
- 4  
5  
6 52. Woods CP, Argese N, Chapman M, et al. Adrenal suppression in patients taking inhaled glucocorticoids is highly prevalent and management can be guided by morning cortisol. *European journal of endocrinology / European Federation of Endocrine Societies* 2015;173:633-42.
- 7  
8  
9 53. Ospina NS, Al Nofal A, Bancos I, et al. ACTH Stimulation Tests for the Diagnosis of Adrenal Insufficiency: Systematic Review and Meta-Analysis. *The Journal of clinical endocrinology and metabolism* 2016;101:427-34.
- 10  
11  
12 54. Salem M, Tainsh RE, Jr., Bromberg J, Loriaux DL, Chernow B. Perioperative glucocorticoid coverage. A reassessment 42 years after emergence of a problem. *Ann Surg* 1994;219:416-25.
- 13  
14  
15 55. Oprea A, Bonnet NCG, Polle O, Lysy PA. Novel insights into glucocorticoid replacement therapy for pediatric and adult adrenal insufficiency. *Ther Adv Endocrinol Metab* 2019;10:2042018818821294.
- 16  
17  
18 56. Hahner S, Spinnler C, Fassnacht M, et al. High incidence of adrenal crisis in educated patients with chronic adrenal insufficiency: a prospective study. *The Journal of clinical endocrinology and metabolism* 2015;100:407-16.
- 19  
20  
21 57. Weise M, Drinkard B, Mehlinger SL, et al. Stress dose of hydrocortisone is not beneficial in patients with classic congenital adrenal hyperplasia undergoing short-term, high-intensity exercise. *The Journal of clinical endocrinology and metabolism* 2004;89:3679-84.
- 22  
23  
24 58. Liu D, Ahmet A, Ward L, et al. A practical guide to the monitoring and management of the complications of systemic corticosteroid therapy. *Allergy, asthma, and clinical immunology : official journal of the Canadian Society of Allergy and Clinical Immunology* 2013;9:30.
- 25  
26  
27 59. Linder BL, Esteban NV, Yergey AL, Winterer JC, Loriaux DL, Cassorla F. Cortisol production rate in childhood and adolescence. *The Journal of pediatrics* 1990;117:892-6.
- 28  
29  
30 60. Bornstein SR, Allolio B, Arlt W, et al. Diagnosis and Treatment of Primary Adrenal Insufficiency: An Endocrine Society Clinical Practice Guideline. *The Journal of clinical endocrinology and metabolism* 2016;101:364-89.
- 31  
32  
33 61. Bancos I, Hahner S, Tomlinson J, Arlt W. Diagnosis and management of adrenal insufficiency. *The lancet Diabetes & endocrinology* 2015;3:216-26.
- 34  
35  
36 62. Charmandari E, Nicolaidis NC, Chrousos GP. Adrenal insufficiency. *Lancet* 2014;383:2152-67.
- 37  
38  
39 63. Borcherding SM, Baciewicz AM, Self TH. Update on rifampin drug interactions. II. *Arch Intern Med* 1992;152:711-6.
- 40  
41  
42 64. Lexicomp. Lexicomp Online. Wolters Kluwer; 2016.
- 43  
44  
45 65. Wade M, Baid S, Calis K, Raff H, Sinaii N, Nieman L. Technical details influence the diagnostic accuracy of the 1 microg ACTH stimulation test. *European journal of endocrinology / European Federation of Endocrine Societies* 2010;162:109-13.
- 46  
47  
48 66. Cartaya J, Misra M. The low-dose ACTH stimulation test: is 30 minutes long enough? *Endocrine practice : official journal of the American College of Endocrinology and the American Association of Clinical Endocrinologists* 2015;21:508-13.
- 49  
50  
51  
52  
53  
54  
55  
56  
57  
58  
59  
60

- 1  
2  
3 67. Gill H WR, Barrowman N, Ahmet A. Evaluating the low-dose ACTH stimulation test:  
4 Ideal timings for cortisol measurement. Journal of Clinical Endocrinology and Metabolism  
5 2019;In Press June 2019.  
6  
7 68. Treatment of adrenal insufficiency in children. UpToDate. Wolters Kluwer, 2016.  
8 (Accessed 13 October, 2016, at [https://www.uptodate.com/index.html#!/contents/treatment-of-](https://www.uptodate.com/index.html#!/contents/treatment-of-adrenal-insufficiency-in-children?source=search_result&search=glucocorticoid%20potency&selectedTitle=6~7.)  
9 [adrenal-insufficiency-in-](https://www.uptodate.com/index.html#!/contents/treatment-of-adrenal-insufficiency-in-children?source=search_result&search=glucocorticoid%20potency&selectedTitle=6~7.)  
10 [children?source=search\\_result&search=glucocorticoid%20potency&selectedTitle=6~7.](https://www.uptodate.com/index.html#!/contents/treatment-of-adrenal-insufficiency-in-children?source=search_result&search=glucocorticoid%20potency&selectedTitle=6~7.))  
11 69. Punthakee Z, Legault L, Polychronakos C. Prednisolone in the treatment of adrenal  
12 insufficiency: a re-evaluation of relative potency. The Journal of pediatrics 2003;143:402-5.  
13 70. Chrousos, Pavlaki AN, Magiakou MA. Glucocorticoid Therapy and Adrenal Suppression  
14 [Updated 2011 Jan 11]. In: De Groot LJ, Chrousos G, Dungan K, et al., eds. South Dartmouth  
15 (MA); Available from: <https://www.ncbi.nlm.nih.gov/books/NBK279156/>: Endotext [Internet];  
16 2011.  
17  
18  
19  
20  
21  
22  
23  
24  
25  
26  
27  
28  
29  
30  
31  
32  
33  
34  
35  
36  
37  
38  
39  
40  
41  
42  
43  
44  
45  
46  
47  
48  
49  
50  
51  
52  
53  
54  
55  
56  
57  
58  
59  
60

# BMJ Paediatrics Open

## Adrenal Suppression from Glucocorticoids: Preventing an Iatrogenic Cause of Morbidity and Mortality in Children

|                               |                                                                                                                                                                                                                                                                                                                                                                                                                                                                                                                                                                                                                                                                                                                                                                                                                                                                                                                                                                                                                                                                                                                        |
|-------------------------------|------------------------------------------------------------------------------------------------------------------------------------------------------------------------------------------------------------------------------------------------------------------------------------------------------------------------------------------------------------------------------------------------------------------------------------------------------------------------------------------------------------------------------------------------------------------------------------------------------------------------------------------------------------------------------------------------------------------------------------------------------------------------------------------------------------------------------------------------------------------------------------------------------------------------------------------------------------------------------------------------------------------------------------------------------------------------------------------------------------------------|
| Journal:                      | <i>BMJ Paediatrics Open</i>                                                                                                                                                                                                                                                                                                                                                                                                                                                                                                                                                                                                                                                                                                                                                                                                                                                                                                                                                                                                                                                                                            |
| Manuscript ID                 | bmjpo-2019-000569.R1                                                                                                                                                                                                                                                                                                                                                                                                                                                                                                                                                                                                                                                                                                                                                                                                                                                                                                                                                                                                                                                                                                   |
| Article Type:                 | Review                                                                                                                                                                                                                                                                                                                                                                                                                                                                                                                                                                                                                                                                                                                                                                                                                                                                                                                                                                                                                                                                                                                 |
| Date Submitted by the Author: | 26-Sep-2019                                                                                                                                                                                                                                                                                                                                                                                                                                                                                                                                                                                                                                                                                                                                                                                                                                                                                                                                                                                                                                                                                                            |
| Complete List of Authors:     | Ahmet, Alexandra; CHEO, Pediatrics, Division Endocrinology; University of Ottawa, Pediatrics<br>Mokashi, Arati; IWK Health Centre, Pediatrics, Division of Pediatric Endocrinology<br>Goldbloom, Ellen; Children's Hospital of Eastern Ontario, Pediatrics, Division of Pediatric Endocrinology; University of Ottawa, Pediatrics<br>Huot, Celine; University of Montreal, Pediatrics, Division of Endocrinology ; CHU Sainte-Justine<br>Jurencak, Roman; Children's Hospital of Eastern Ontario, Pediatrics, Division of Rheumatology; University of Ottawa, Pediatrics<br>Krishnamoorthy, Preetha; Montreal Childrens Hospital, Pediatrics, Division of Endocrinology; McGill University, Pediatrics<br>Rowan-Legg, Anne; Children's Hospital of Eastern Ontario, Pediatrics ; University of Ottawa, Pediatrics<br>Kim, Harold; St. Joseph's Hospital, Department of Medicine, Division of Clinical Immunology and Allergy<br>Pancer, Larry; Markham Stouffville Hospital, Pediatrics<br>Kovesi, Tom; Children's Hospital of Eastern Ontario, Pediatrics, Division of Respiriology; University of Ottawa, Pediatrics |
| Keywords:                     | Endocrinology, Therapeutics                                                                                                                                                                                                                                                                                                                                                                                                                                                                                                                                                                                                                                                                                                                                                                                                                                                                                                                                                                                                                                                                                            |
|                               |                                                                                                                                                                                                                                                                                                                                                                                                                                                                                                                                                                                                                                                                                                                                                                                                                                                                                                                                                                                                                                                                                                                        |

SCHOLARONE™  
Manuscripts

## Adrenal Suppression from Glucocorticoids: Preventing an Iatrogenic Cause of Morbidity and Mortality in Children

Alexandra Ahmet<sup>a</sup>, MD; Arati Mokashi<sup>b</sup>, MD; Ellen B Goldbloom<sup>a</sup>, MD; Celine Huot, MD<sup>c</sup>; Roman Jurencak<sup>d</sup>, MD; Preetha Krishnamoorthy<sup>e</sup>, MD; Anne Rowan-Legg<sup>f</sup>, MD; Harold Kim<sup>g</sup>, MD; Larry Pancer<sup>h</sup>, MD; Tom Kovesi<sup>i</sup>, MD

**Affiliations:** <sup>a</sup>Department of Pediatrics, Division of Endocrinology, Children's Hospital of Eastern Ontario, University of Ottawa, Ottawa, ON, Canada; <sup>b</sup>Department of Pediatrics, Division of Endocrinology, IWK Health Centre, Dalhousie University, Halifax, NS, Canada; <sup>c</sup>Department of Pediatrics, Division of Endocrinology, CHU Sainte-Justine, University de Montreal, Montreal, QC, Canada; <sup>d</sup>Department of Pediatrics, Division of Rheumatology, Children's Hospital of Eastern Ontario, University of Ottawa, Ottawa, ON, Canada; <sup>e</sup>Department of Pediatrics, Division of Endocrinology, Montreal Children's Hospital, McGill University, Montreal, QC, Canada; <sup>f</sup>Department of Pediatrics, Children's Hospital of Eastern Ontario, University of Ottawa, Ottawa, ON, Canada; <sup>g</sup>Department of Medicine, Division of Clinical Immunology and Allergy, St. Joseph's Hospital, London, ON, Canada and Department of Medicine, Division of Clinical Immunology and Allergy, Hamilton, ON, Canada; <sup>h</sup>Department of Pediatrics, Markham Stouffville Hospital, Markham, ON, Canada; <sup>i</sup>Department of Pediatrics, Division of Respiriology, Children's Hospital of Eastern Ontario, University of Ottawa, Ottawa, ON, Canada.

**Address correspondence to:** Alexandra Ahmet, Children's Hospital of Eastern Ontario, 401 Smyth Rd., Ottawa ON, Canada, K1H 8L1, [aahmet@cheo.on.ca](mailto:aahmet@cheo.on.ca), 613-737-7600 ext. 3939

**Word Count:** 2942 (exclusive of abstract, title page, titles, tables, and references)

**Abstract**

Adrenal suppression (AS) is an important side effect of glucocorticoids (GCs) including inhaled corticosteroids (ICS). AS can often be asymptomatic or associated with non-specific symptoms until a physiological stress such as an illness precipitates an adrenal crisis. Morbidity and death associated with adrenal crisis is preventable but continues to be reported in children. There is a lack of consensus about the management of children at risk of AS. However, health care professionals need to develop an awareness and approach to keep these children safe. In this article, current knowledge of the risk factors, diagnosis and management of AS are reviewed while drawing attention to knowledge gaps and areas of controversy. Possible strategies to reduce the morbidity associated with this iatrogenic condition are provided for health care professionals.

## Introduction

Glucocorticoids (GCs), including inhaled corticosteroids (ICS), are essential for the treatment of many pediatric disorders and have led to significant improvements in disease outcomes.

Hypothalamic Pituitary Adrenal (HPA) axis suppression, or adrenal suppression (AS), is a potential side effect of GC therapy, and can be associated with significant morbidity and even death.<sup>1-3</sup>

The HPA axis is under circadian regulation and operates in a negative feedback loop to regulate cortisol secretion. The hypothalamus releases corticotrophin releasing hormone (CRH) which stimulates the pituitary gland to release adrenocorticotrophic hormone (ACTH) which in turn stimulates the adrenal glands to secrete cortisol. Cortisol has inhibitory effects on both the release of CRH at the level of the hypothalamus and of ACTH at the level of the pituitary gland, in turn downregulating cortisol production and secretion. Exogenous glucocorticoids exert negative feedback at the level of the hypothalamus and pituitary gland, leading to a reduction in CRH and ACTH and in some cases adrenocortical hypoplasia or atrophy. These changes are associated with decreased cortisol production leading to adrenal insufficiency (AI). AI secondary to exogenous glucocorticoid exposure is also referred to as adrenal suppression.<sup>3-5</sup>

Adrenal suppression is the most common form of adrenal insufficiency amongst both children and adults.<sup>6,7</sup> Despite being a treatable condition, failure of adequate preventative measures or delayed treatment has led to unnecessary morbidity and death in individuals with AI including AS.<sup>6-8</sup>

1  
2  
3 Symptoms of AS are often non-specific (Table 1) and can go undetected until a physiologic  
4 stress (illness, surgery, injury) precipitates an adrenal crisis.<sup>6</sup> Adrenal crisis has also been  
5 reported in the absence of physiologic stress, likely secondary to unrecognized signs or  
6 symptoms of AS.<sup>2,6</sup> Symptomatic AS including adrenal crisis can be prevented by recognizing  
7 children at risk and administering physiologic GC replacement and/or higher doses of GCs  
8 during times of stress.<sup>3,6</sup>  
9  
10  
11  
12  
13  
14  
15  
16  
17  
18  
19

20 A recent study evaluating the national incidence of symptomatic AS in children in Canada  
21 reported 46 cases including 6 (13%) cases of adrenal crisis over 2 years with 37/46 (80%) of  
22 children using ICS either alone or in combination with another form of GC.<sup>8</sup> Asymptomatic  
23 biochemical evidence of AS is considerably more frequent with nearly 100% of patients having  
24 AS immediately after discontinuation of high dose systemic therapy but significantly less  
25 frequent if measured after days or weeks or if exposed to other forms of GC therapy.<sup>9-12</sup>  
26  
27  
28  
29  
30  
31  
32  
33  
34  
35

36 Despite clear evidence of the morbidity associated with AS in the pediatric population, evidence-  
37 based guidelines about screening and management of children at risk are lacking. There are few  
38 known risk factors for the development of *symptomatic* AS, therefore the burden of screening for  
39 and managing asymptomatic biochemical AS needs to be balanced with the risk of severe  
40 morbidity and mortality in a subset of patients. There is a lack of consensus amongst pediatric  
41 endocrinologists about the approach to the management of children at risk of AS and as a result,  
42 clinicians who are prescribing GC therapy may have limited guidance about how to keep their  
43 patients safe. Within this review article, our working group comprised of pediatric  
44 endocrinologists, pediatricians and other pediatric subspecialists who frequently prescribe GC  
45  
46  
47  
48  
49  
50  
51  
52  
53  
54  
55  
56  
57  
58  
59  
60



1  
2  
3 therapy present the best available evidence about AS risk, screening, testing and management  
4 while acknowledging the controversies that exist about the management of AS. The intent of  
5 this review is to draw attention to this important entity and to allow the reader to create an  
6 informed and practical approach to the management of their patients at risk.  
7  
8  
9

### 10 11 12 13 **Adrenal suppression in children treated with systemic glucocorticoids** 14 15

16 Both clinical and biochemical evidence of AS have been well described in children following  
17 discontinuation of therapeutic doses of systemic GCs.<sup>10,12-14</sup> Shorter term systemic GC exposure  
18 is associated with more transient AS.<sup>15,16</sup> In practice, exposure for greater than 2 weeks is used  
19 as a threshold for risk of clinically important AS.<sup>6</sup> Duration of AS following prolonged GC  
20 exposure has been reported to be up to 2 years.<sup>9,12</sup> Symptomatic AS including adrenal crisis and  
21 death are well documented related to systemic GC therapy.<sup>3,8,13,17</sup> Higher dose is a risk factor  
22  
23  
24  
25  
26  
27  
28  
29  
30  
31  
32  
33  
34  
35  
36  
37  
38  
39  
40  
41  
42  
43  
44  
45  
46  
47  
48  
49  
50  
51  
52  
53  
54  
55  
56  
57  
58  
59  
60

We did not find literature exploring risk of repeated intermittent GC exposure.

### **Adrenal suppression in children treated for asthma with inhaled corticosteroids**

Symptomatic AS associated with ICS use is rare but important and the risk can be reduced by  
using the lowest dose of ICS sufficient to maintain acceptable asthma control, as outlined in  
current asthma guidelines.<sup>20-22</sup> National asthma guidelines recommend consultation with asthma  
specialists if children or adolescents meet criteria for treatment with high (or moderate) dose ICS  
therapy.<sup>22 20,21</sup>

1  
2  
3 There have been more than 90 case reports in the literature of adrenal crisis or death secondary to  
4 ICS use for the treatment of asthma.<sup>1,23-25</sup> Pharmacokinetic and pharmacodynamic properties  
5 and dose, in addition to ICS mode of delivery, play a role in the risk of AS<sup>2</sup> and therefore doses  
6 associated with increased risk of AS risk differ between medications (see Table 2). Clinicians  
7 can consider the use of high dose ICS therapy as defined by asthma guidelines as an important  
8 risk factor for AS, particularly because the current literature does not provide clear thresholds for  
9 AS risk.<sup>8,11,20-22,26-28</sup> An important exception to this rule is fluticasone, an ICS that has been  
10 associated with the majority of cases of symptomatic AS in doses of 500 µg daily or greater (500  
11 µg is moderate dosing for children ≥ 12 years in some guidelines).<sup>1,2,4,8,24,29,30</sup> In addition,  
12 ciclesonide, a comparatively newer ICS, appears to have reduced AS risk<sup>2,4,20,25,31,32</sup> although  
13 cases of AS have been reported at high doses.<sup>33</sup>

14  
15 While the majority of cases of symptomatic AS have been reported in children exposed to high  
16 dose ICS, there are rare reported cases of those receiving low to moderate dosing,<sup>2,33</sup>  
17 highlighting the importance of consideration of AS in children presenting with possible signs or  
18 symptoms of AS regardless of ICS dose. Conversely, while high dose ICS therapy increases the  
19 risk of AS, many children receiving high dose therapy are not suppressed<sup>11</sup>. A recent genome-  
20 wide association study suggests that a common genetic variant might lead to susceptibility to AS  
21 in patients exposed to ICS but further study is needed to support this finding.<sup>34</sup> There are also  
22 many genetic variants of the GC receptor gene which are thought to explain the wide inter-  
23 individual variation in GC sensitivity<sup>5</sup> and several single nucleotide polymorphisms that have  
24 been associated with HPA axis reactivity<sup>3</sup>, both of which likely in part explain the variability in  
25 AS susceptibility. Other possible factors contributing to inter-patient variability in the

1  
2  
3 development of AS include inhaler technique, age and asthma severity which might impact both  
4  
5 ICS deposition in the lungs and the amount of ICS absorbed into the systemic circulation.  
6  
7

8  
9 In addition to high dose ICS therapy, exposure to courses of systemic GCs for treatment of  
10  
11 asthma put children at risk of AS.<sup>1,2,4,31</sup> Achieving good asthma control with skilled use of  
12  
13 controller therapy, including appropriately dosed ICS, will prevent exacerbations and reduce the  
14  
15 need for long-term and/or repeated courses of GCs.<sup>35</sup> Other possible risk factors include  
16  
17 concomitant intranasal corticosteroids, low BMI and cumulative glucocorticoid exposure.<sup>2,8</sup>  
18  
19 Duration of ICS exposure has not been found to be a risk factor, however most studies have  
20  
21 looked at exposures of 6 weeks or more.<sup>34</sup>  
22  
23

24  
25  
26 <sup>3,5,11</sup>Clinicians need to be aware of the ICS doses contained in combination inhalers and should  
27  
28 consider those as increasing the risk of AS based on the ICS component (see Table 2).  
29  
30

### 31 **Adrenal suppression in children treated with other forms of glucocorticoids**

32  
33

34  
35 Studies of the risk of AS related to intranasal corticosteroids alone have had variable results  
36  
37 although use in conjunction with ICS is a risk factor.<sup>36,37,38</sup>  
38  
39

40  
41 While the use of low to moderate potency topical corticosteroids is rarely associated with a risk  
42  
43 of AS<sup>39</sup>, there have been case reports of symptomatic AS and cushingoid features in infants  
44  
45 receiving potent topical GCs for >1 month with misuse of the medication.<sup>40</sup> Symptomatic AS  
46  
47 associated with cushingoid features has also been reported with ocular GCs.<sup>41</sup> AS has been  
48  
49 associated with intra-articular GCs in adults.<sup>42</sup>  
50  
51

52  
53 Studies suggest that children receiving swallowed ICS for eosinophilic esophagitis or  
54  
55 inflammatory bowel disease are at risk of AS.<sup>8,43,44</sup>  
56  
57  
58  
59  
60

### **Medications potentiating systemic effects of glucocorticoids**

CYP3A4 inhibitors, including several antiretroviral medications, antifungal agents and select antidepressants, prolong the biologic half-life of GCs. These medications have been reported (a) in several cases of symptomatic AS associated with relatively low doses of ICS, and (b) with a prolonged duration of AS following systemic GC exposure.<sup>10,45,46</sup>

### **Glucocorticoid taper**

There is no evidence to support a specific approach to GC taper for the prevention of AS.<sup>3,47</sup> It has been demonstrated that a gradual GC taper does not prevent AS.<sup>12</sup> GCs should be tapered or discontinued at a rate dictated by the underlying condition in order to maintain disease remission; if not indicated for prevention of disease relapse, a prolonged taper should be avoided to prevent unnecessary GC exposure. Physiological GC replacement should prevent symptoms of AS,<sup>6</sup> so testing of the HPA axis prior to discontinuing or tapering GCs below a physiological dose (<8mg/m<sup>2</sup>/day hydrocortisone equivalent) should be considered in children who have received prolonged courses of GCs (Table 5 -GC dose equivalencies). Symptoms of GC withdrawal can occur during a rapid taper and may mimic symptoms of AS despite biochemical evidence of HPA system integrity or adequate GC replacement.<sup>48</sup> Clinicians need to be aware of this possibility, evaluate for possible AS, and modify their taper accordingly.

### **Testing for adrenal suppression**

Testing for adrenal insufficiency (AI), including AS, is a challenge for clinicians due to lack of standardization of cortisol assays and lack of clinical association with established cortisol

1  
2  
3 thresholds used for diagnosis.<sup>49,50</sup> Of particular note are newer generation assays including the  
4  
5 Roche Cortisol II immunoassay which is reported to measure cortisol levels approximately 30%  
6  
7 lower than the older Roche immunoassay.<sup>51</sup> Clinicians must be aware of the thresholds  
8  
9 associated with the assay used in their local laboratory.  
10  
11

12  
13  
14 Cortisol thresholds cited within this section are reported from studies that have employed older  
15  
16 generation immunoassays and as such, need to be interpreted with caution. First morning  
17  
18 cortisol (7-9 am) is often used in screening for AI. A first morning cortisol is specific for  
19  
20 diagnosis of AI if  $\leq 100\text{nmol/L}$  ( $\leq 3.6\mu\text{g/dL}$ ) in individuals with a normal sleep-wake cycle in  
21  
22 whom GCs are withheld for *at least* 24 hours.<sup>52,53</sup> GCs with longer duration of action must be  
23  
24 held for longer than 24 hours. Clinicians must assess the safety of discontinuing GC therapy for  
25  
26 testing and modify their approach accordingly (see Table 3). Since cortisol production is under  
27  
28 circadian regulation, a low morning cortisol is poorly predictive of AS in infants and children  
29  
30 who do not have a regular sleep-wake cycle, and dynamic testing is indicated.<sup>54</sup> A first  
31  
32 morning cortisol value of  $\geq 350 - 500\text{nmol/L}$  ( $\geq 13-18\mu\text{g/dL}$ ) can predict normal HPA axis  
33  
34 function.<sup>53,55,56</sup> The Pediatric Endocrine Society Pharmacy and Therapeutics guideline about  
35  
36 endocrine side effects of ICS suggests that a first morning cortisol value of  $275\text{nmol/L}$   
37  
38 ( $10\mu\text{g/dL}$ ) may be considered as a screening threshold in asymptomatic patients<sup>2</sup>. However,  
39  
40 there is no single absolute cutoff for morning cortisol that can be used to confidently rule in or  
41  
42 out AS.  
43  
44  
45  
46  
47  
48  
49  
50  
51

52 Provocative testing is typically required for diagnosis of central AI including AS. Both standard  
53  
54 dose ( $250\mu\text{g}$ ) and low dose ( $1\mu\text{g}$ ) ACTH stimulation tests are used in clinical practice for  
55  
56

1  
2  
3 evaluation of central AI with significant debate about which is superior, some studies suggesting  
4 that the low dose stimulation test (LDST) is significantly more sensitive but less specific with  
5 other studies not supporting this finding.<sup>50,55,57</sup> Peak cortisol thresholds of 440-600 nmol/L (16-  
6 22µg/dL) are commonly used to rule out AI but vary between studies and institutions since many  
7 factors must be considered when interpreting results (e.g., cortisol assay, timing of cortisol draws  
8 relative to corticotropin administration, medications affecting cortisol binding, time of  
9 day).<sup>54,58,59</sup> Clinicians must therefore refer to their local protocols for guidance. Appropriate  
10 preparation and procedures for testing of the HPA axis are required (See Table 3).  
11  
12  
13  
14  
15  
16  
17  
18  
19  
20  
21

### 22 **Glucocorticoid replacement**

23  
24  
25 Cortisol production is significantly higher during physiological stress in healthy individuals.<sup>60</sup>  
26 Individuals with AI are at risk of adrenal crisis during illness, surgery or injury. Gastrointestinal  
27 illness is the most common precipitant of adrenal crisis.<sup>61</sup> In practice, stress dosing of GCs is  
28 provided during physiological stresses in order to prevent adrenal crisis in children with AI  
29 (Table 4).<sup>13,17,62</sup> There is currently insufficient data to recommend GC coverage during  
30 moderate-to-extreme activity or emotional stress.<sup>6,63</sup>  
31  
32  
33  
34  
35  
36  
37  
38  
39

40 Hydrocortisone is the medication of choice for stress dosing, particularly during adrenal crisis  
41 because of its mineralocorticoid effect (Table 4).<sup>61</sup> However, in practice, while receiving active  
42 systemic GC therapy, stress dosing for moderate illness is often provided using the same form of  
43 GC that is being used to treat disease, rather than hydrocortisone (see Table 5 for relative  
44 potencies).  
45  
46  
47  
48  
49  
50  
51  
52  
53  
54  
55  
56  
57  
58  
59  
60

1  
2  
3 Children with symptomatic AS require daily physiologic GC replacement<sup>2</sup> (Table 4). Daily GC  
4 replacement is also an important consideration in children with clear biochemical evidence of  
5 AS<sup>64</sup>, even in the absence of well-defined symptoms, but remains controversial among pediatric  
6 endocrinologists, with no literature supporting or refuting this approach. Hydrocortisone, with  
7 its short half-life, is the drug of choice for daily replacement with dosing of approximately  
8 8mg/m<sup>2</sup>/day considered to be physiological.<sup>65,66</sup> While three times daily (TID) hydrocortisone  
9 dosing is standard of care in primary AI,<sup>66</sup> many endocrinologists provide once or twice daily  
10 dosing in AS, with higher doses in the morning to reduce the ongoing suppression of endogenous  
11 morning cortisol production in *asymptomatic* patients. There is no evidence to support this  
12 approach but in practice, it is used by several members of our working group with the  
13 assumption that the AI in cases of asymptomatic AS is partial and that this approach will help to  
14 reduce the risk of prolonging suppression. Clinicians must be aware of the short half-life of  
15 hydrocortisone and provide BID or TID dosing if a child is symptomatic and during times of  
16 stress.<sup>6,67,68</sup>

17  
18  
19 Strong CYP3A4 inducers, such as phenobarbital, carbamazepine or rifampicin, may decrease the  
20 serum concentration of GCs requiring an awareness of the need for dose adjustment in the  
21 context of ongoing symptoms or poor response to stress dosing in the management of AS.<sup>69,70</sup>

#### 22 **How can we reduce the risk of AS and adrenal crisis?**

23  
24 Despite being largely preventable, morbidity and mortality associated with AS continue to be  
25 reported. We suggest that the following measures be considered to reduce this risk:

- 1  
2  
3 1. Clinician education and awareness about the risk of AS including an understanding of the  
4 relatively high frequency of AS in patients being treated with  $\geq 500$  mcg of fluticasone or  
5 high dose ICS therapy as defined by national or international asthma guidelines.  
6  
7
- 8  
9  
10 2. Clinicians should prescribe the lowest effective dose of GCs with regular re-evaluation.  
11 If once-daily GC dosing is appropriate, GCs should be given in the morning to minimize  
12 suppression of the HPA axis.  
13  
14
- 15  
16 3. Families should be educated about the risk of AS with an understanding that the benefits  
17 of GC therapy outweigh the risks, and that medication adherence and clinical follow-up  
18 are the best preventative measures for symptomatic AS.  
19  
20
- 21 4. All children with possible signs or symptoms of AS, including poor growth, and with  
22 current or recent history of GC/ICS use should be tested for AS. Symptomatic children  
23 with biochemical evidence of AS should be treated with both physiological GC  
24 replacement and stress dosing GCs (Table 4).  
25  
26
- 27 5. Stress dosing should be provided for critical illness or major surgery, in all children being  
28 actively treated with GCs and should be *considered* in all children who have recently  
29 discontinued GC therapy (up to a year for those with prolonged exposure) unless they  
30 have been proven to have a normal HPA axis. Cortisol should be drawn prior to  
31 initiating stress dosing during a critical illness if the diagnosis of AS is not confirmed.  
32  
33
- 34 6. Screening of children at high risk of AS should be *considered*. An alternative approach  
35 may be to provide empiric stress dosing once GC doses are tapered to  $<30$  mg/m<sup>2</sup>/day of  
36  
37  
38  
39  
40  
41  
42  
43  
44  
45  
46  
47  
48  
49  
50  
51  
52  
53  
54  
55  
56  
57  
58  
59  
60



hydrocortisone equivalent and for up to 6-12 months following GC discontinuation.

There is no evidence to support a specific approach to asymptomatic children with AS.

7. Children with biochemical evidence of AS should receive stress dosing. Treatment with physiological GC dosing should be considered.
8. Families of children with proven or suspected AS should be educated about stress dosing (Table 4) and provided with a stress dosing card or handout outlining doses, indications for stress dosing and indications to seek emergency help. Wearing a medical alert identification should be considered.
9. Family/caregiver education for administration of intramuscular (IM) hydrocortisone for use during severe illness or when unable to tolerate oral therapy should be considered for all children with possible or proven AS, especially in those who live or travel remotely.

## Conclusions

While relatively uncommon, symptomatic AS can be associated with significant morbidity and mortality. Symptomatic AS can be prevented by responsible GC prescribing and follow-up, recognition of signs and symptoms including poor growth, and screening and treatment of children at increased risk. Education of clinicians and at-risk patients/parents about AS is integral to reducing morbidity associated with this iatrogenic condition. Until further evidence is available, consultation with an endocrinologist should be considered when there is uncertainty about how to approach the management of a child or adolescent with possible or proven AS. Clinicians and families should not lose sight of the fact that GCs are essential for the

1  
2  
3 management of many pediatric conditions and that the risk of AS should not be a barrier to their  
4  
5 use.  
6  
7

8  
9 **Acknowledgements:** We would like to thank Victor Konji (PhD) for his assistance with our  
10 literature review and article referencing.  
11

12 **Competing interests:** AA has received honoraria as a consultant to Reveragen. HK has served  
13 as a speaker and/or advisor for ALK, Aralez, Astrazeneca, CSL Behring, Shire,  
14 Novartis, Pediapharm, Stallergenes, Kaleo, Sanofi, Pfizer, and Mylan.  
15  
16

17 **Contributors statement:**  
18

19 AA led the development and coordination of the working group for the development of the  
20 review article, performed a literature review with the assistance of Victor Konji, wrote the initial  
21 draft of the manuscript, finalized edits submitted by authors and contributed her expertise as a  
22 pediatric endocrinologist.  
23

24 AM, EG, CH and PK (pediatric endocrinologists) participated in teleconferences informing the  
25 content of the review article, reviewed and edited the manuscript and contributed their expertise  
26 as pediatric endocrinologists.  
27

28 TK(pediatric respirologist), RJ(pediatric rheumatologist), and HK (allergist) participated in  
29 teleconferences informing the content of the review article, reviewed and edited the manuscript  
30 and contributed their expertise as sub-specialists who frequently prescribe glucocorticoids.  
31  
32

33 AR-L and LP participated in teleconferences informing the content of the review article,  
34 reviewed and edited the manuscript and contributed their expertise as general pediatricians who  
35 prescribe glucocorticoids to the recommendations.  
36

37 All authors approved the final revised manuscript as submitted and agree to be accountable for  
38 all aspects of the work.  
39  
40  
41  
42  
43  
44  
45  
46  
47  
48  
49  
50  
51  
52  
53  
54  
55  
56  
57  
58  
59  
60

**Table 1. Presenting symptoms and signs associated with Adrenal Suppression**

|                                                       |
|-------------------------------------------------------|
| <b>Symptoms/Signs of Possible Adrenal Suppression</b> |
| Poor linear growth*                                   |
| Poor weight gain                                      |
| Anorexia                                              |
| Nausea/vomiting                                       |
| Malaise                                               |
| Weakness/fatigue                                      |
| Headache                                              |
| Abdominal pain                                        |
| Myalgia/arthralgia                                    |
| Psychiatric symptoms                                  |
| <b>Signs of Adrenal Crisis</b>                        |
| Hypotension                                           |
| Hypoglycemia (seizure/coma)                           |
| <b>Signs Associated with Adrenal Suppression</b>      |
| Cushingoid features                                   |

\*Poor linear growth has been reported in close to 50% of patients with symptomatic AS.<sup>8</sup> Table adapted from Ahmet et al 2011.<sup>4</sup>

**Table 2. ICS type and doses associated with increased Adrenal Suppression risk<sup>a</sup>**

| Corticosteroid                                                         | Dose associated with increased AS risk <sup>b</sup><br>(µg/day) | Dose associated with increased AS risk <sup>b</sup><br>(µg/day) |
|------------------------------------------------------------------------|-----------------------------------------------------------------|-----------------------------------------------------------------|
|                                                                        | Canadian/European Dosing                                        | American Dosing                                                 |
| Beclomethasone dipropionate HFA <sup>26</sup>                          | >400                                                            | >320                                                            |
| Budesonide DPI <sup>8,26</sup><br>Budesonide and formoterol            | ≥800                                                            | ≥800                                                            |
| Ciclesonide <sup>c</sup>                                               | >400                                                            | >320                                                            |
| Fluticasone propionate <sup>1,8,11</sup><br>Fluticasone and salmeterol | ≥500                                                            | ≥440 (HFA)<br>≥500 (DPI)                                        |
| Fluticasone furoate DPI <sup>27</sup>                                  | ≥100                                                            | ≥100                                                            |
| Mometasone DPI <sup>28</sup><br>Mometasone formoterol                  | ≥800                                                            | ≥800                                                            |

<sup>a</sup>Doses associated with increased risk of AS are based on the best available literature. Where no specific evidence for AS risk in pediatrics was available, doses cited are from adult studies with the exception of ciclesonide. Because of lack of clear thresholds for increased risk, we recommend that high dose therapy (as defined by national or international guidelines)<sup>20-22</sup>, prompts the clinician to consider patients to be at increased risk recognizing that AS is possible even with low to moderate dosing.

<sup>b</sup> In the US, inhaler dose is based on the amount leaving the mouthpiece, rather than the amount leaving the canister, this accounts for differences in listed (but not actual) doses.

1  
2  
3       <sup>c</sup>While ciclesonide has been demonstrated to have reduced risk of systemic side effects, cases of  
4 AS have been reported with high doses<sup>33</sup>  
5

6       <sup>d</sup>Fluticasone Furoate (Arnuity Ellipta and Breo Ellipta) contain a new potent ICS. 100µg daily is  
7 equivalent to 500µg daily of fluticasone. This formulation has a high potential risk for AS. <sup>27</sup>  
8  
9

10  
11  
12  
13  
14  
15  
16  
17  
18  
19  
20  
21  
22  
23  
24  
25  
26  
27  
28  
29  
30  
31  
32  
33  
34  
35  
36  
37  
38  
39  
40  
41  
42  
43  
44  
45  
46  
47  
48  
49  
50  
51  
52  
53  
54  
55  
56  
57  
58  
59  
60

Confidential: For Review Only

**Table 3. Tests of HPA axis function: Considerations for testing**

| Procedure                              | Considerations for testing                                                                                                                                                                                                                                                                                                                                                                                                                                                                                                                     |
|----------------------------------------|------------------------------------------------------------------------------------------------------------------------------------------------------------------------------------------------------------------------------------------------------------------------------------------------------------------------------------------------------------------------------------------------------------------------------------------------------------------------------------------------------------------------------------------------|
| All Tests                              | <ul style="list-style-type: none"> <li>• Hold all oral GCs prior to the test based on their duration of action<sup>a</sup>:               <ul style="list-style-type: none"> <li>○ hydrocortisone x 24 hours,</li> <li>○ prednisone x 48 hours,</li> <li>○ dexamethasone x 72 hours</li> </ul> </li> <li>• Consideration of a switch to hydrocortisone prior to testing should be considered in children at high risk of AS<sup>a</sup></li> <li>• Hold ICS the evening and morning prior to the test if patient stable<sup>b</sup></li> </ul> |
| First morning cortisol <sup>c</sup>    | <ul style="list-style-type: none"> <li>• 7-9 am test (Before 8 am is optimal)</li> <li>• Tests drawn after 9 am must be repeated if abnormal</li> </ul>                                                                                                                                                                                                                                                                                                                                                                                        |
| Low dose ACTH stimulation <sup>h</sup> | <ul style="list-style-type: none"> <li>• Perform test in the morning<sup>71</sup></li> <li>• 1µg corticotropin analog<sup>f;5</sup></li> <li>• Minimal tubing length for administration of corticotropin reduces the possibility of adherence to plastic tubing<sup>71</sup></li> <li>• Cortisol drawn at 0, 15, 30 and 60 minutes for peak levels<sup>g;58</sup></li> </ul>                                                                                                                                                                   |
| Standard dose ACTH stimulation         | <ul style="list-style-type: none"> <li>• 250µg<sup>h</sup> corticotropin analog</li> <li>• Cortisol drawn at 0, 30 and 60 minutes</li> <li>• Currently no evidence to support morning vs afternoon testing</li> </ul>                                                                                                                                                                                                                                                                                                                          |

<sup>a</sup>In some cases, it may be unsafe to hold medications for the duration required. Consideration of a wean to physiological hydrocortisone dosing may be made in some circumstances to facilitate testing and address safety concerns.

1  
2  
3 <sup>b</sup>In children where it is unsafe to hold evening ICS dose, abnormal cortisol levels must be  
4 interpreted with caution.

5 <sup>c</sup>In infants and children with disrupted sleep-wake cycles, an abnormal first morning cortisol is  
6 not diagnostic of AS. Provocative testing is indicated.

7 <sup>d</sup>Provocative testing is required to definitively rule in or out AS.

8 <sup>e</sup>Careful dilution and timely administration of corticotropin is required. <sup>71</sup>

9 <sup>f</sup>Protocols for Low Dose ACTH stimulation tests including timing of cortisol samples may vary  
10 between institutions.

11 <sup>g</sup>For infants: corticotropin dose =15µg/kg up to a maximum dose of 250µg  
12  
13  
14  
15  
16  
17  
18  
19  
20  
21  
22  
23  
24  
25  
26  
27  
28  
29  
30  
31  
32  
33  
34  
35  
36  
37  
38  
39  
40  
41  
42  
43  
44  
45  
46  
47  
48  
49  
50  
51  
52  
53  
54  
55  
56  
57  
58  
59  
60

**Table 4. Glucocorticoid replacement and stress dosing**

| Indication                                                                                                                                                | Glucocorticoid dose <sup>a,b</sup>                                                                                                                                                                                                                                                |
|-----------------------------------------------------------------------------------------------------------------------------------------------------------|-----------------------------------------------------------------------------------------------------------------------------------------------------------------------------------------------------------------------------------------------------------------------------------|
| Adrenal crisis, severe illness or severe injury                                                                                                           | Hydrocortisone 100 mg/m <sup>2</sup> (max 100 mg) IV/IM stat, then 100 mg/m <sup>2</sup> (max 200 mg) divided q 6 hours or by continuous infusion                                                                                                                                 |
| Major Surgery                                                                                                                                             | Hydrocortisone 50-100 mg/m <sup>2</sup> IV (max 100 mg) pre-op, then 100 mg/m <sup>2</sup> /24 hrs IV (max 200 mg) by continuous infusion or divided q 6 hrs                                                                                                                      |
| Minor to Moderate Surgery or procedure requiring general anesthesia                                                                                       | Hydrocortisone 50 mg/m <sup>2</sup> IV (max 100 mg) pre-op, then as indicated by clinical status (typically moderate illness dosing x 1-2 days)                                                                                                                                   |
| Moderate Illness including fever $\geq 38.5^{\circ}$ , vomiting, diarrhea, severe head cold with fatigue or injury<br><i>Able to tolerate orally</i>      | 30 mg/m <sup>2</sup> /day hydrocortisone equivalent <sup>c</sup> divided TID until resolution of symptoms<br>Duration >3 days should be reassessed by the health care team <sup>d</sup>                                                                                           |
| Moderate Illness including fever $\geq 38.5^{\circ}$ , vomiting, diarrhea, severe head cold with fatigue or injury<br><i>Inability to tolerate orally</i> | Hydrocortisone must be given parenterally<br>30-50 mg/m <sup>2</sup> /day hydrocortisone divided q 6 hourly IV or q 8 hourly IM<br>Consult endocrinology to re-assess parenteral dose if the child is still unable to tolerate orally after 24 hours of parenteral administration |
| Severe illness or moderate illness and unable to tolerate orally BEFORE arriving in ED                                                                    | Consider teaching administration of IM hydrocortisone in all patients with AS<br>Families who do not have rapid access to a hospital ED or who are planning remote travel (airplane, camping, etc.) should be taught administration of IM hydrocortisone                          |
| <b>Daily Physiologic Hydrocortisone Dosing</b>                                                                                                            |                                                                                                                                                                                                                                                                                   |
| 8 mg/m <sup>2</sup> /day hydrocortisone daily (divided BID-TID if symptomatic with higher dose in the morning)                                            |                                                                                                                                                                                                                                                                                   |



1  
2  
3  
4 <sup>a</sup>Poor evidence for pediatric dosing. Recommendations based on expert opinion and best  
5 available evidence. <sup>6,66-68</sup>  
6

7  
8 <sup>b</sup>Dosing may need to be adjusted in children receiving CYP3A4 Inducers. Endocrinology should  
9 be consulted in these cases.  
10

11 <sup>c</sup>In children on active therapy in doses  $\geq 30$  mg/m<sup>2</sup>/day hydrocortisone equivalent  
12 ( $\geq 7.5$  mg/m<sup>2</sup>/day prednisone), stress dosing for mild-moderate illness can be achieved by dividing  
13 the therapeutic prednisone dose to be given BID (i.e. therapeutic dose is sufficient for stress  
14 coverage). Once therapeutic GC is no longer needed, stress dosing should be provided using  
15 hydrocortisone.  
16  
17

18 <sup>d</sup>Frequent or prolonged duration of stress dosing can contribute to adrenal suppression. Stress  
19 dosing is not required for very mild symptoms such as a persistent runny nose.  
20  
21  
22  
23  
24  
25  
26  
27  
28  
29  
30  
31  
32  
33  
34  
35  
36  
37  
38  
39  
40  
41  
42  
43  
44  
45  
46  
47  
48  
49  
50  
51  
52  
53  
54  
55  
56  
57  
58  
59  
60

**Table 5. Relative glucocorticoid potencies<sup>a</sup>**

|                           | Anti-Inflammatory Potency | HPA Suppression Potency <sup>b</sup> | Duration of action (hours) |
|---------------------------|---------------------------|--------------------------------------|----------------------------|
| Hydrocortisone (cortisol) | 1                         | 1                                    | 8 to 12                    |
| Prednisone                | 4                         | 4                                    | 12 to 36                   |
| Prednisolone              | 4                         | 4                                    | 12 to 36                   |
| Methylprednisolone        | 5                         | 5                                    | 12 to 36                   |
| Dexamethasone             | 30                        | 50 (17-100)                          | 36 to 72                   |

<sup>a</sup>HPA suppression potencies should be used when calculating hydrocortisone equivalent doses for evaluation of AS risk

<sup>b</sup>Available data about relative HPA suppression potency is limited and widely variable. Studies of growth suppressive effects of prednisone, prednisolone, methylprednisolone and dexamethasone suggest that secondary effects on growth relative to anti-inflammatory effects may be significantly higher. References <sup>72-74</sup>

## References:

1. Todd GR, Acerini CL, Ross-Russell R, Zahra S, Warner JT, McCance D. Survey of adrenal crisis associated with inhaled corticosteroids in the United Kingdom. *Arch Dis Child* 2002;87:457-61.
2. Kapadia CR, Nebesio TD, Myers SE, et al. Endocrine Effects of Inhaled Corticosteroids in Children. *JAMA Pediatr* 2016;170:163-70.
3. Dinsen S, Baslund B, Klose M, et al. Why glucocorticoid withdrawal may sometimes be as dangerous as the treatment itself. *Eur J Intern Med* 2013;24:714-20.
4. Ahmet A, Kim H, Spier S. Adrenal suppression: A practical guide to the screening and management of this under-recognized complication of inhaled corticosteroid therapy. *Allergy Asthma Clin Immunol* 2011;7:13.
5. Miller WLF, Christa E. In: Sperling MA, ed. *Pediatric Endocrinology*. Fourth Edition ed. Philadelphia, PA: Elsevier 2014:521-5.
6. Shulman DI, Palmert MR, Kemp SF. Adrenal insufficiency: still a cause of morbidity and death in childhood. *Pediatrics* 2007;119:e484-94.
7. Puar TH, Stikkelbroeck NM, Smans LC, Zelissen PM, Hermus AR. Adrenal Crisis: Still a Deadly Event in the 21st Century. *Am J Med* 2016;129:339 e1-9.
8. Goldbloom EB, Mokashi A, Cummings EA, et al. Symptomatic adrenal suppression among children in Canada. *Arch Dis Child* 2017;102:338-9.
9. Wildi-Runge S, Deladoey J, Belanger C, et al. A search for variables predicting cortisol response to low-dose corticotropin stimulation following supraphysiological doses of glucocorticoids. *The Journal of pediatrics* 2013;163:484-8.
10. Rensen N, Gemke RJ, van Dalen EC, Rotteveel J, Kaspers GJ. Hypothalamic-pituitary-adrenal (HPA) axis suppression after treatment with glucocorticoid therapy for childhood acute lymphoblastic leukaemia. *Cochrane Database Syst Rev* 2017;11:CD008727.
11. Smith RW, Downey K, Gordon M, et al. Prevalence of hypothalamic-pituitary-adrenal axis suppression in children treated for asthma with inhaled corticosteroid. *Paediatr Child Health* 2012;17:e34-9.
12. Ahmet A, Brienza V, Tran A, et al. Frequency and Duration of Adrenal Suppression Following Glucocorticoid Therapy in Children With Rheumatic Diseases. *Arthritis Care Res (Hoboken)* 2017;69:1224-30.
13. Einaudi S, Bertorello N, Masera N, et al. Adrenal axis function after high-dose steroid therapy for childhood acute lymphoblastic leukemia. *Pediatr Blood Cancer* 2008;50:537-41.
14. Bowden SA, Connolly AM, Kinnett K, Zeitler PS. Management of Adrenal Insufficiency Risk After Long-term Systemic Glucocorticoid Therapy in Duchenne Muscular Dystrophy: Clinical Practice Recommendations. *J Neuromuscul Dis* 2019;6:31-41.
15. Zora JA, Zimmerman D, Carey TL, O'Connell EJ, Yunginger JW. Hypothalamic-pituitary-adrenal axis suppression after short-term, high-dose glucocorticoid therapy in children with asthma. *J Allergy Clin Immunol* 1986;77:9-13.
16. Henzen C, Suter A, Lerch E, Urbinelli R, Schorno XH, Briner VA. Suppression and recovery of adrenal response after short-term, high-dose glucocorticoid treatment. *Lancet* 2000;355:542-5.
17. Rix M, Birkebaek NH, Rosthoj S, Clausen N. Clinical impact of corticosteroid-induced adrenal suppression during treatment for acute lymphoblastic leukemia in children: a prospective observational study using the low-dose adrenocorticotropin test. *The Journal of pediatrics* 2005;147:645-50.
18. Hawcutt DB, Jorgensen AL, Wallin N, et al. Adrenal responses to a low-dose short synacthen test in children with asthma. *Clinical endocrinology* 2015;82:648-56.

19. Adam HM. Fever and host responses. *Pediatr Rev* 1996;17:330-1.
20. Lougheed MD, Lemiere C, Ducharme FM, et al. Canadian Thoracic Society 2012 guideline update: diagnosis and management of asthma in preschoolers, children and adults. *Can Respir J* 2012;19:127-64.
21. National Asthma Education and Prevention Program (NAEPP). Expert Panel Report 3: Guidelines for the Diagnosis and Management of Asthma. National Heart, Lung and Blood Institute 2007. . (Accessed September 22, 2019, at <https://www.nhlbi.nih.gov/files/docs/guidelines/asthgdln.pdf>.)
22. Global Initiative for Asthma (GINA). Global Strategy for Asthma Management and Prevention. . (Accessed September 18, 2019, at [www.ginasthma.org](http://www.ginasthma.org).)
23. Donaldson MD, Morrison C, Lees C, et al. Fatal and near-fatal encephalopathy with hyponatraemia in two siblings with fluticasone-induced adrenal suppression. *Acta Paediatr* 2007;96:769-72.
24. Schwartz RH, Neacsu O, Ascher DP, Alpan O. Moderate dose inhaled corticosteroid-induced symptomatic adrenal suppression: case report and review of the literature. *Clinical pediatrics* 2012;51:1184-90.
25. Heller MK, Laks J, Kovesi TA, Ahmet A. Reversal of adrenal suppression with ciclesonide. *J Asthma* 2010;47:337-9.
26. Ninan TK, Reid IW, Carter PE, Smail PJ, Russell G. Effects of high doses of inhaled corticosteroids on adrenal function in children with severe persistent asthma. *Thorax* 1993;48:599-602.
27. Lotvall J, Bleecker ER, Busse WW, et al. Efficacy and safety of fluticasone furoate 100 mug once-daily in patients with persistent asthma: a 24-week placebo and active-controlled randomised trial. *Respir Med* 2014;108:41-9.
28. Fardon TC, Lee DK, Haggart K, McFarlane LC, Lipworth BJ. Adrenal suppression with dry powder formulations of fluticasone propionate and mometasone furoate. *Am J Respir Crit Care Med* 2004;170:960-6.
29. Zollner EW. Hypothalamic-pituitary-adrenal axis suppression in asthmatic children on inhaled corticosteroids (Part 2)--the risk as determined by gold standard adrenal function tests: a systematic review. *Pediatr Allergy Immunol* 2007;18:469-74.
30. Patel L, Wales JK, Kibirige MS, Massarano AA, Couriel JM, Clayton PE. Symptomatic adrenal insufficiency during inhaled corticosteroid treatment. *Arch Dis Child* 2001;85:330-4.
31. Lipworth BJ, Kaliner MA, LaForce CF, et al. Effect of ciclesonide and fluticasone on hypothalamic-pituitary-adrenal axis function in adults with mild-to-moderate persistent asthma. *Ann Allergy Asthma Immunol* 2005;94:465-72.
32. Liddell BS, Oberlin JM, Hsu DP. Inhaled corticosteroid related adrenal suppression detected by poor growth and reversed with ciclesonide. *J Asthma* 2017;54:99-104.
33. Cavkaytar O, Vuralli D, Arik Yilmaz E, et al. Evidence of hypothalamic-pituitary-adrenal axis suppression during moderate-to-high-dose inhaled corticosteroid use. *Eur J Pediatr* 2015;174:1421-31.
34. Hawcutt DB, Francis B, Carr DF, et al. Susceptibility to corticosteroid-induced adrenal suppression: a genome-wide association study. *Lancet Respir Med* 2018;6:442-50.
35. Guilbert TW, Morgan WJ, Zeiger RS, et al. Long-term inhaled corticosteroids in preschool children at high risk for asthma. *The New England journal of medicine* 2006;354:1985-97.
36. Patel D, Ratner P, Clements D, Wu W, Faris M, Philpot E. Lack of effect on adult and adolescent hypothalamic-pituitary-adrenal axis function with use of fluticasone furoate nasal spray. *Ann Allergy Asthma Immunol* 2008;100:490-6.
37. Skoner DP, Berger WE, Gawchik SM, Akbary A, Qiu C. Intranasal triamcinolone and growth velocity. *Pediatrics* 2015;135:e348-56.

- 1
- 2
- 3 38. Zollner EW, Lombard C, Galal U, Hough S, Irusen E, Weinberg E. Hypothalamic-pituitary-adrenal
- 4 axis suppression in asthmatic children on inhaled and nasal corticosteroids--more common than
- 5 expected? *J Pediatr Endocrinol Metab* 2011;24:529-34.
- 6
- 7 39. Wood Heckman LK, Davallow Ghajar L, Conaway M, Rogol AD. Evaluation of Hypothalamic-
- 8 Pituitary-Adrenal Axis Suppression following Cutaneous Use of Topical Corticosteroids in Children: A
- 9 Meta-Analysis. *Horm Res Paediatr* 2018;89:389-96.
- 10
- 11 40. Bulus AD, Andiran N, Kocak M. Cushing's syndrome: hidden risk in usage of topical
- 12 corticosteroids. *J Pediatr Endocrinol Metab* 2014;27:977-81.
- 13
- 14 41. Chiang MY, Sarkar M, Koppens JM, Milles J, Shah P. Exogenous Cushing's syndrome and topical
- 15 ocular steroids. *Eye (Lond)* 2006;20:725-7.
- 16
- 17 42. Johnston PC, Lansang MC, Chatterjee S, Kennedy L. Intra-articular glucocorticoid injections and
- 18 their effect on hypothalamic-pituitary-adrenal (HPA)-axis function. *Endocrine* 2015;48:410-6.
- 19
- 20 43. Ahmet A, Benchimol EI, Goldbloom EB, Barkey JL. Adrenal suppression in children treated with
- 21 swallowed fluticasone and oral viscous budesonide for eosinophilic esophagitis. *Allergy Asthma Clin*
- 22 *Immunol* 2016;12:49: eCollection 2016.
- 23
- 24 44. Cohen SA, Aloji M, Arumugam R, et al. Enteric-coated budesonide for the induction and
- 25 maintenance of remission of Crohn's disease in children. *Curr Med Res Opin* 2017;33:1261-8.
- 26
- 27 45. Foisy MM, Yakiwchuk EM, Chiu I, Singh AE. Adrenal suppression and Cushing's syndrome
- 28 secondary to an interaction between ritonavir and fluticasone: a review of the literature. *HIV medicine*
- 29 *2008;9:389-96.*
- 30
- 31 46. Bornstein SR. Predisposing factors for adrenal insufficiency. *The New England journal of*
- 32 *medicine* 2009;360:2328-39.
- 33
- 34 47. Richter B, Neises G, Clar C. Glucocorticoid withdrawal schemes in chronic medical disorders. A
- 35 systematic review. *Endocrinology and metabolism clinics of North America* 2002;31:751-78.
- 36
- 37 48. Dixon RB, Christy NP. On the various forms of corticosteroid withdrawal syndrome. *Am J Med*
- 38 *1980;68:224-30.*
- 39
- 40 49. Hawley JM, Owen LJ, Lockhart SJ, et al. Serum Cortisol: An Up-To-Date Assessment of Routine
- 41 Assay Performance. *Clin Chem* 2016;62:1220-9.
- 42
- 43 50. Ng SM, Agwu JC, Dwan K. A systematic review and meta-analysis of Synacthen tests for
- 44 assessing hypothalamic-pituitary-adrenal insufficiency in children. *Arch Dis Child* 2016;101:847-53.
- 45
- 46 51. Kline GA, Buse J, Krause RD. Clinical implications for biochemical diagnostic thresholds of
- 47 adrenal sufficiency using a highly specific cortisol immunoassay. *Clin Biochem* 2017;50:475-80.
- 48
- 49 52. Maguire AM, Biesheuvel CJ, Ambler GR, Moore B, McLean M, Cowell CT. Evaluation of adrenal
- 50 function using the human corticotrophin-releasing hormone test, low dose Synacthen test and 9am
- 51 cortisol level in children and adolescents with central adrenal insufficiency. *Clinical endocrinology*
- 52 *2008;68:683-91.*
- 53
- 54 53. Le Roux CW, Meeran K, Alagband-Zadeh J. Is a 0900-h serum cortisol useful prior to a short
- 55 synacthen test in outpatient assessment? *Ann Clin Biochem* 2002;39:148-50.
- 56
- 57 54. Kazlauskaitė R, Maghnie M. Pitfalls in the diagnosis of central adrenal insufficiency in children.
- 58 *Endocr Dev* 2010;17:96-107.
- 59
- 60 55. Kazlauskaitė R, Evans AT, Villabona CV, et al. Corticotropin tests for hypothalamic-pituitary-
- adrenal insufficiency: a metaanalysis. *The Journal of clinical endocrinology and metabolism*
- 2008;93:4245-53.*
- 56 56. Woods CP, Argese N, Chapman M, et al. Adrenal suppression in patients taking inhaled
- glucocorticoids is highly prevalent and management can be guided by morning cortisol. *European*
- journal of endocrinology / European Federation of Endocrine Societies* 2015;173:633-42.

- 1
- 2
- 3 57. Ospina NS, Al Nofal A, Bancos I, et al. ACTH Stimulation Tests for the Diagnosis of Adrenal
- 4 Insufficiency: Systematic Review and Meta-Analysis. *The Journal of clinical endocrinology and*
- 5 *metabolism* 2016;101:427-34.
- 6
- 7 58. Gill H, Barrowman N, Webster R, Ahmet A. Evaluating the Low-Dose ACTH Stimulation Test in
- 8 Children: Ideal Times for Cortisol Measurement. *The Journal of clinical endocrinology and metabolism*
- 9 *2019;104:4587-93.*
- 10 59. Park J, Didi M, Blair J. The diagnosis and treatment of adrenal insufficiency during childhood and
- 11 adolescence. *Arch Dis Child* 2016;101:860-5.
- 12 60. Salem M, Tainsh RE, Jr., Bromberg J, Loriaux DL, Chernow B. Perioperative glucocorticoid
- 13 coverage. A reassessment 42 years after emergence of a problem. *Ann Surg* 1994;219:416-25.
- 14 61. Oprea A, Bonnet NCG, Polle O, Lysy PA. Novel insights into glucocorticoid replacement therapy
- 15 for pediatric and adult adrenal insufficiency. *Ther Adv Endocrinol Metab* 2019;10:2042018818821294.
- 16 62. Hahner S, Spinnler C, Fassnacht M, et al. High incidence of adrenal crisis in educated patients
- 17 with chronic adrenal insufficiency: a prospective study. *The Journal of clinical endocrinology and*
- 18 *metabolism* 2015;100:407-16.
- 19
- 20 63. Weise M, Drinkard B, Mehlinger SL, et al. Stress dose of hydrocortisone is not beneficial in
- 21 patients with classic congenital adrenal hyperplasia undergoing short-term, high-intensity exercise. *The*
- 22 *Journal of clinical endocrinology and metabolism* 2004;89:3679-84.
- 23 64. Liu D, Ahmet A, Ward L, et al. A practical guide to the monitoring and management of the
- 24 complications of systemic corticosteroid therapy. *Allergy, asthma, and clinical immunology : official*
- 25 *journal of the Canadian Society of Allergy and Clinical Immunology* 2013;9:30.
- 26 65. Linder BL, Esteban NV, Yergey AL, Winterer JC, Loriaux DL, Cassorla F. Cortisol production rate in
- 27 childhood and adolescence. *The Journal of pediatrics* 1990;117:892-6.
- 28
- 29 66. Bornstein SR, Allolio B, Arlt W, et al. Diagnosis and Treatment of Primary Adrenal Insufficiency:
- 30 An Endocrine Society Clinical Practice Guideline. *The Journal of clinical endocrinology and metabolism*
- 31 *2016;101:364-89.*
- 32 67. Bancos I, Hahner S, Tomlinson J, Arlt W. Diagnosis and management of adrenal insufficiency. *The*
- 33 *lancet Diabetes & endocrinology* 2015;3:216-26.
- 34 68. Charmandari E, Nicolaides NC, Chrousos GP. Adrenal insufficiency. *Lancet* 2014;383:2152-67.
- 35 69. Borcharding SM, Baciewicz AM, Self TH. Update on rifampin drug interactions. II. *Arch Intern*
- 36 *Med* 1992;152:711-6.
- 37
- 38 70. Lexicomp. Lexicomp Online. Wolters Kluwer; 2016.
- 39 71. Wade M, Baid S, Calis K, Raff H, Sinaii N, Nieman L. Technical details influence the diagnostic
- 40 accuracy of the 1 microg ACTH stimulation test. *European journal of endocrinology / European*
- 41 *Federation of Endocrine Societies* 2010;162:109-13.
- 42 72. Treatment of adrenal insufficiency in children. UpToDate. Wolters Kluwer, 2016. (Accessed 13
- 43 October, 2016, at [https://www.uptodate.com/index.html#!/contents/treatment-of-adrenal-](https://www.uptodate.com/index.html#!/contents/treatment-of-adrenal-insufficiency-in-children?source=search_result&search=glucocorticoid%20potency&selectedTitle=6~7.)
- 44 [insufficiency-in-children?source=search\\_result&search=glucocorticoid%20potency&selectedTitle=6~7.](https://www.uptodate.com/index.html#!/contents/treatment-of-adrenal-insufficiency-in-children?source=search_result&search=glucocorticoid%20potency&selectedTitle=6~7.))
- 45 73. Punthakee Z, Legault L, Polychronakos C. Prednisolone in the treatment of adrenal insufficiency:
- 46 a re-evaluation of relative potency. *The Journal of pediatrics* 2003;143:402-5.
- 47 74. Chrousos, Pavlaki AN, Magiakou MA. Glucocorticoid Therapy and Adrenal Suppression [Updated
- 48 2011 Jan 11]. In: De Groot LJ, Chrousos G, Dungan K, et al., eds. South Dartmouth (MA); Available from:
- 49 <https://www.ncbi.nlm.nih.gov/books/NBK279156/>; Endotext [Internet]; 2011.
- 50
- 51
- 52
- 53
- 54
- 55
- 56
- 57
- 58
- 59
- 60
